# Supplementary material for: CircSOBP suppresses the progression of glioma by disrupting glycolysis and promoting the MDA5-mediated immune response
Source: PubMed Central journal article supplement — iScience. 2023 Sep 13;26(10):107897. doi: 10.1016/j.isci.2023.107897 (PMC10520879; doi:10.1016/j.isci.2023.107897), 2023-09-13

iScience, Volume 26

## **Supplemental information**

**CircSOBP suppresses the progression of glioma  
by disrupting glycolysis and promoting  
the MDA5-mediated immune response**

**Maolin Mu, Wanxiang Niu, Fang Chu, Qingsheng Dong, Shanshan Hu, and Chaoshi Niu**

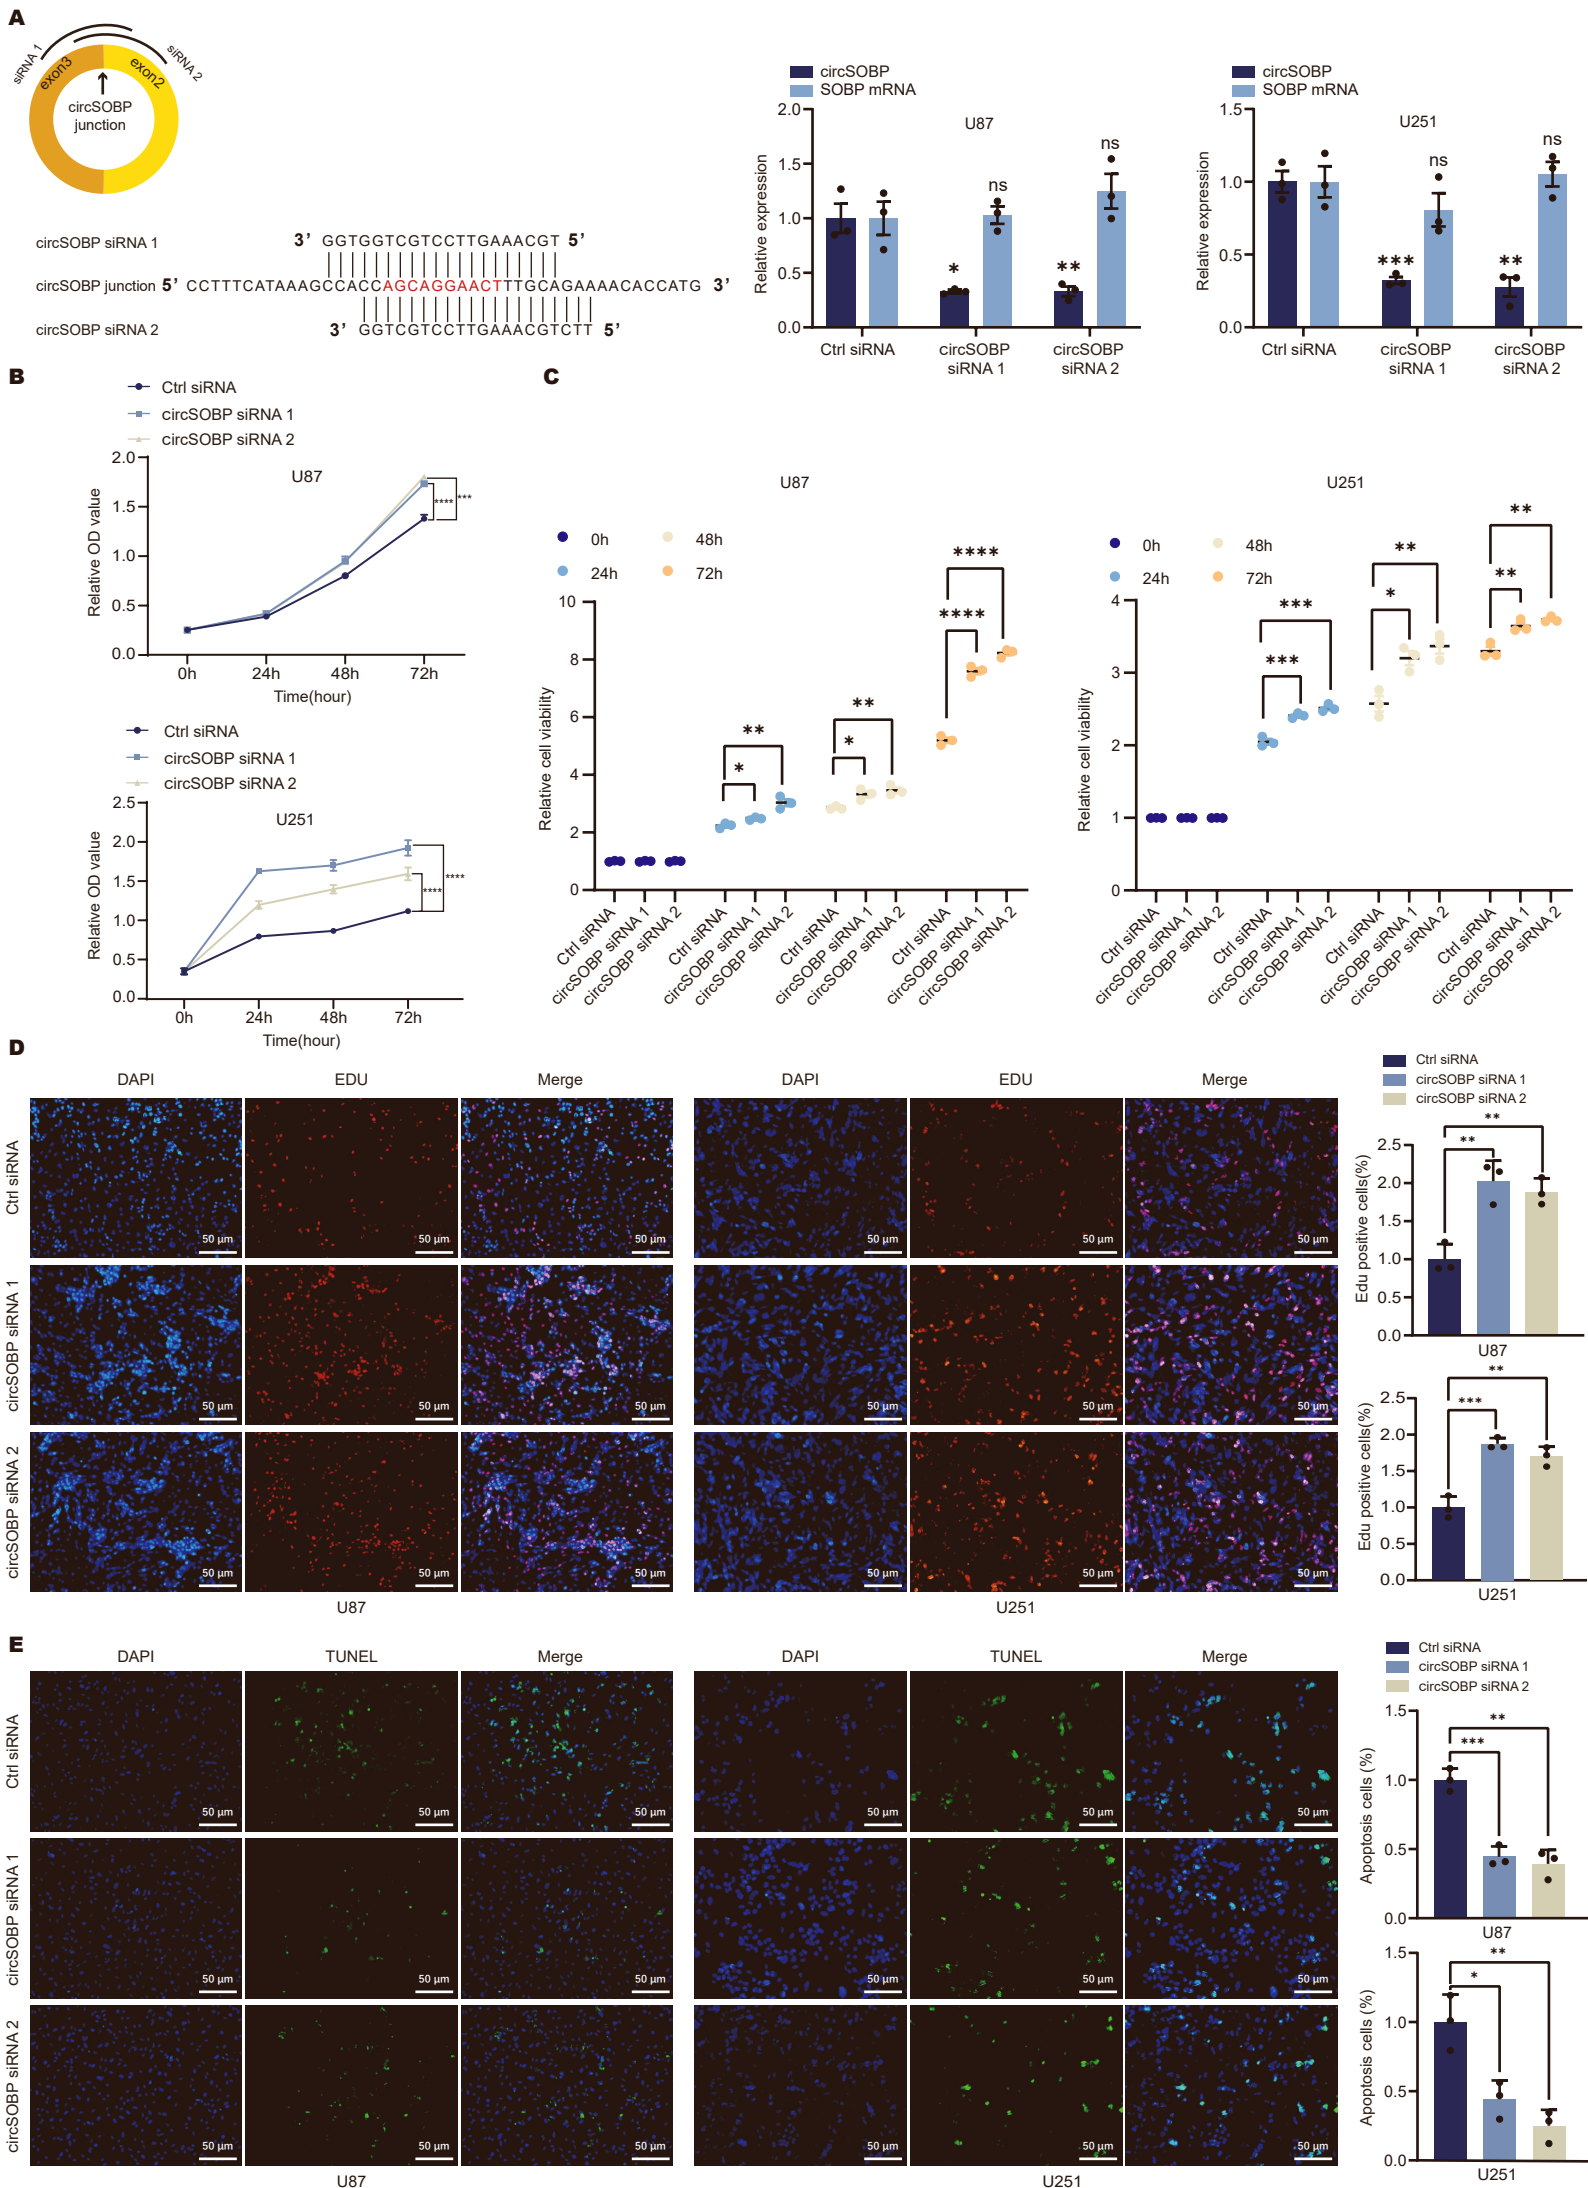

**Figure. S1 Knockdown of circSOBP expression promoted the proliferation of glioma cells. Related to Figure 2. (A)**

The effects of two independent siRNAs on the expression of circSOBP and SOBP mRNA in U87 and U251 cells were assessed by RT-qPCR. siRNA 1 and siRNA 2 are two siRNAs that target the circSOBP back-spliced junction. **(B)** CCK-8 analysis of circSOBP silencing in glioma cells. **(C)** Cell viability was detected at 0 h, 24 h, 48 h, and 72 h after transfection with Ctrl siRNA or CircSOBP siRNAs in U87 and U251 cells. **(D)** Proliferation of U87 and U251 cells was examined by Edu assay. Nuclei were stained with 4,6-diamidino-2-phenylindole (DAPI). Scale bars, 50  $\mu$ m. **(E)** Apoptosis of U87 and U251 cells was detected by TUNEL assay. Nuclei were stained with 4,6-diamidino-2-phenylindole (DAPI). Scale bars, 50  $\mu$ m. All statistics of error bars, S.E.M. from three independent experiments. NS, not significant; \*P < 0.05; \*\*P < 0.01; \*\*\*P < 0.001; \*\*\*\*p < 0.0001 by two-tailed Student's t test. The values of siRNA1-2 were normalized by Ctrl siRNA.

**A**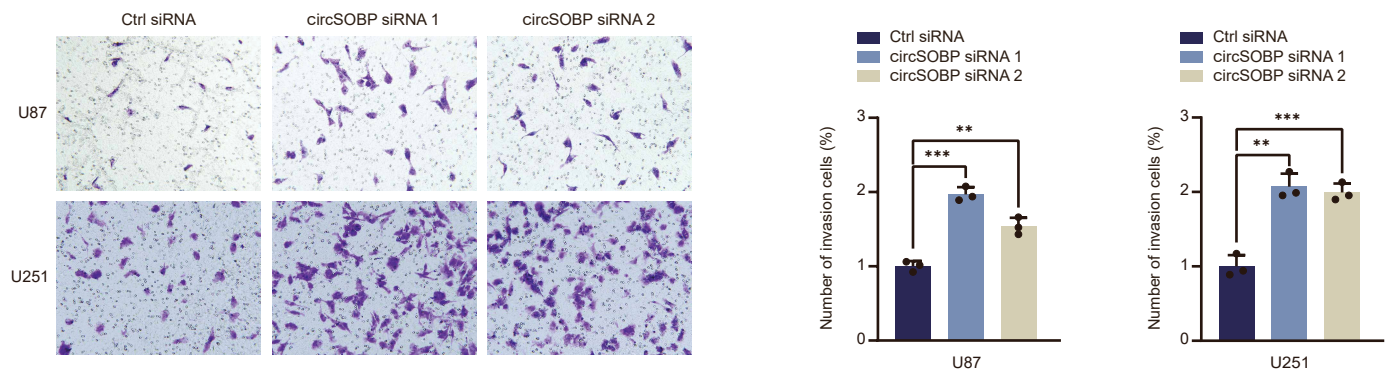**B**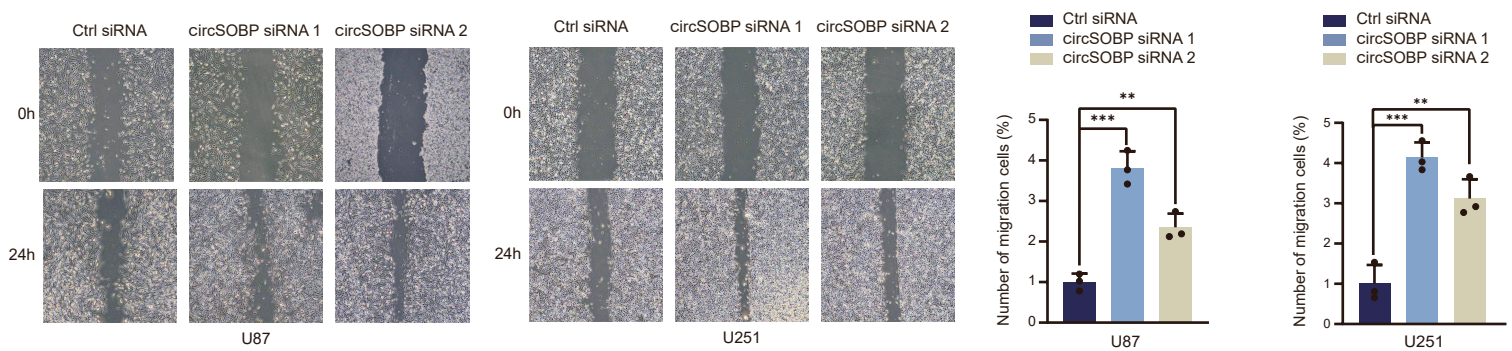

**Figure. S2 Knockdown of circSOBP expression promotes the invasive and migratory ability of glioma cells. Related to Figure 2. (A) Transwell assays of glioma cells with silencing of circSOBP. (B) Wound-healing assays of glioma cells with silencing of circSOBP. All statistics of error bars, S.E.M. from three independent experiments. NS, not significant; \*\*P < 0.01; \*\*\*P < 0.001 by two-tailed Student's t test. The values of siRNA1-2 were normalized by Ctrl siRNA.**



A

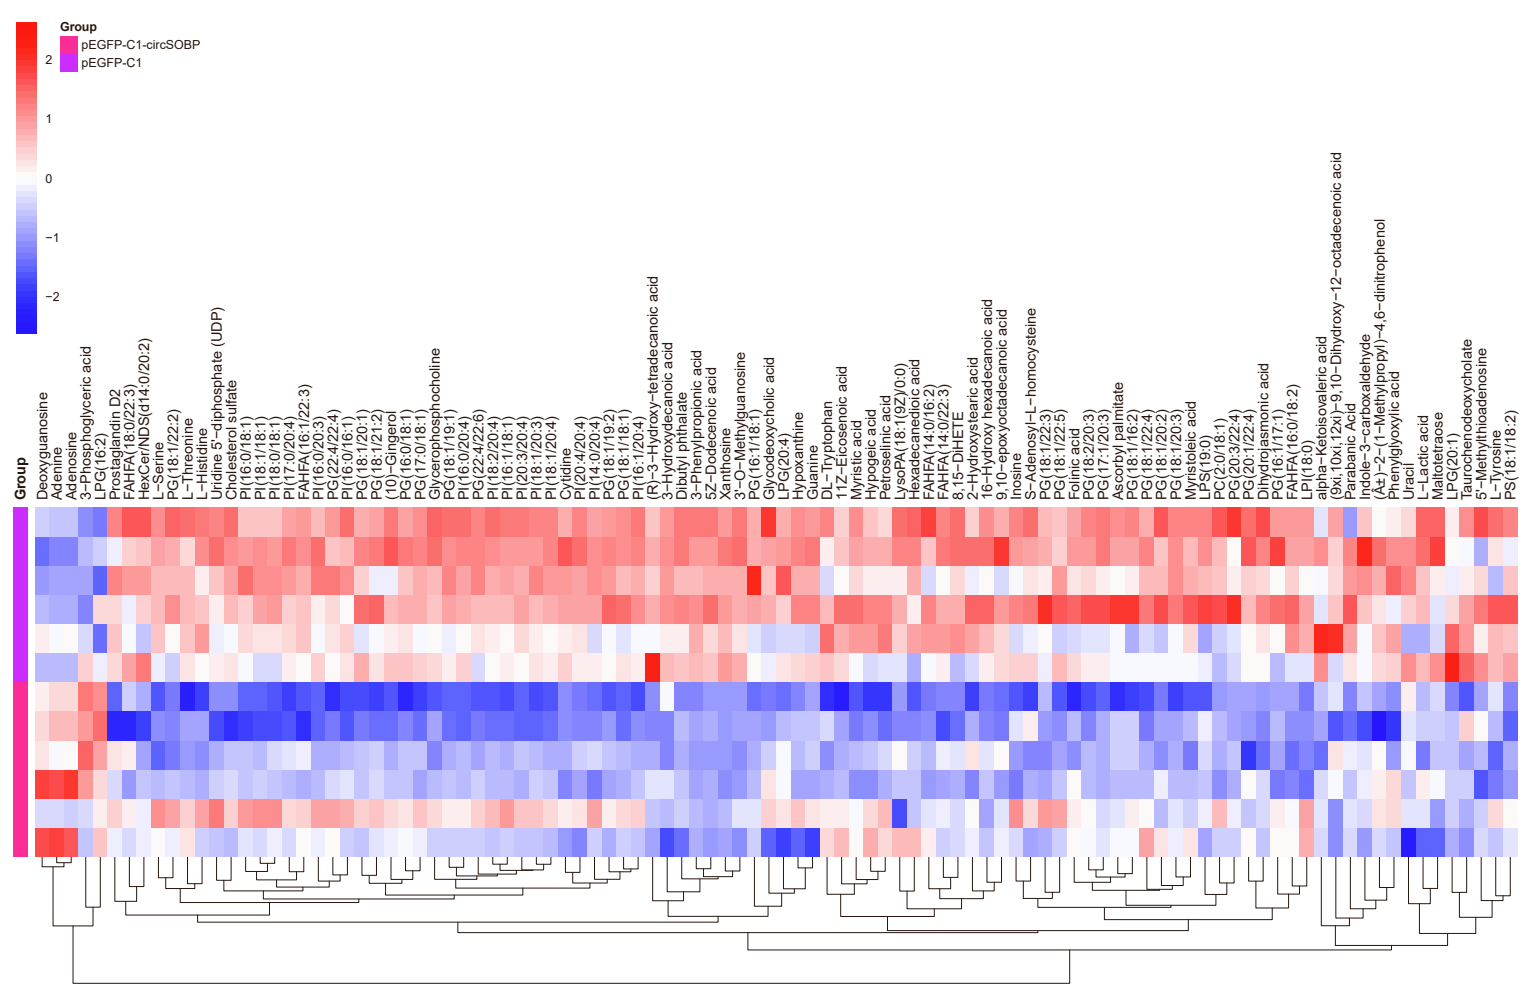

B

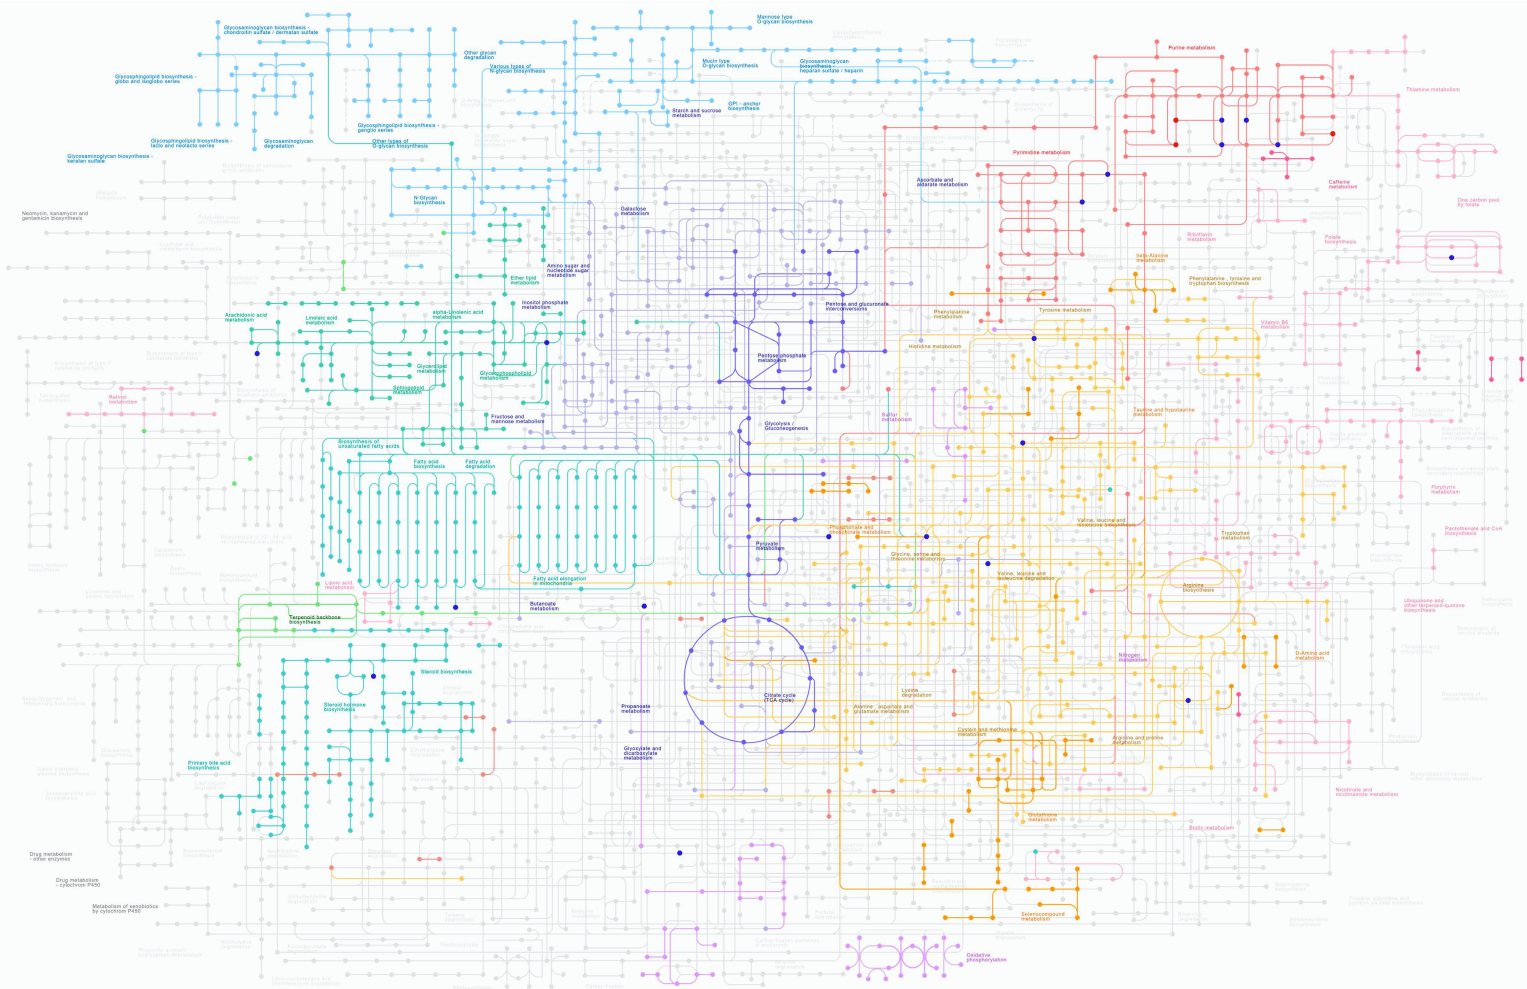

**Figure. S3 Comparison of metabolic status of glioma cells with circSOBP overexpression. Related to Figure 3. (A)** Heat map of metabolite clusters in the overexpression circSOBP and control groups measured by LC-MS-based metabolomics approach in U87 cells. Horizontal axis represents grouping type; vertical axis represents differential metabolites. **(B)** The differential metabolites of metabolomics were integrated and displayed in a comprehensive metabolic map using KEGG metabolic map. Dots represent compounds; lines indicate the involved metabolic reactions.

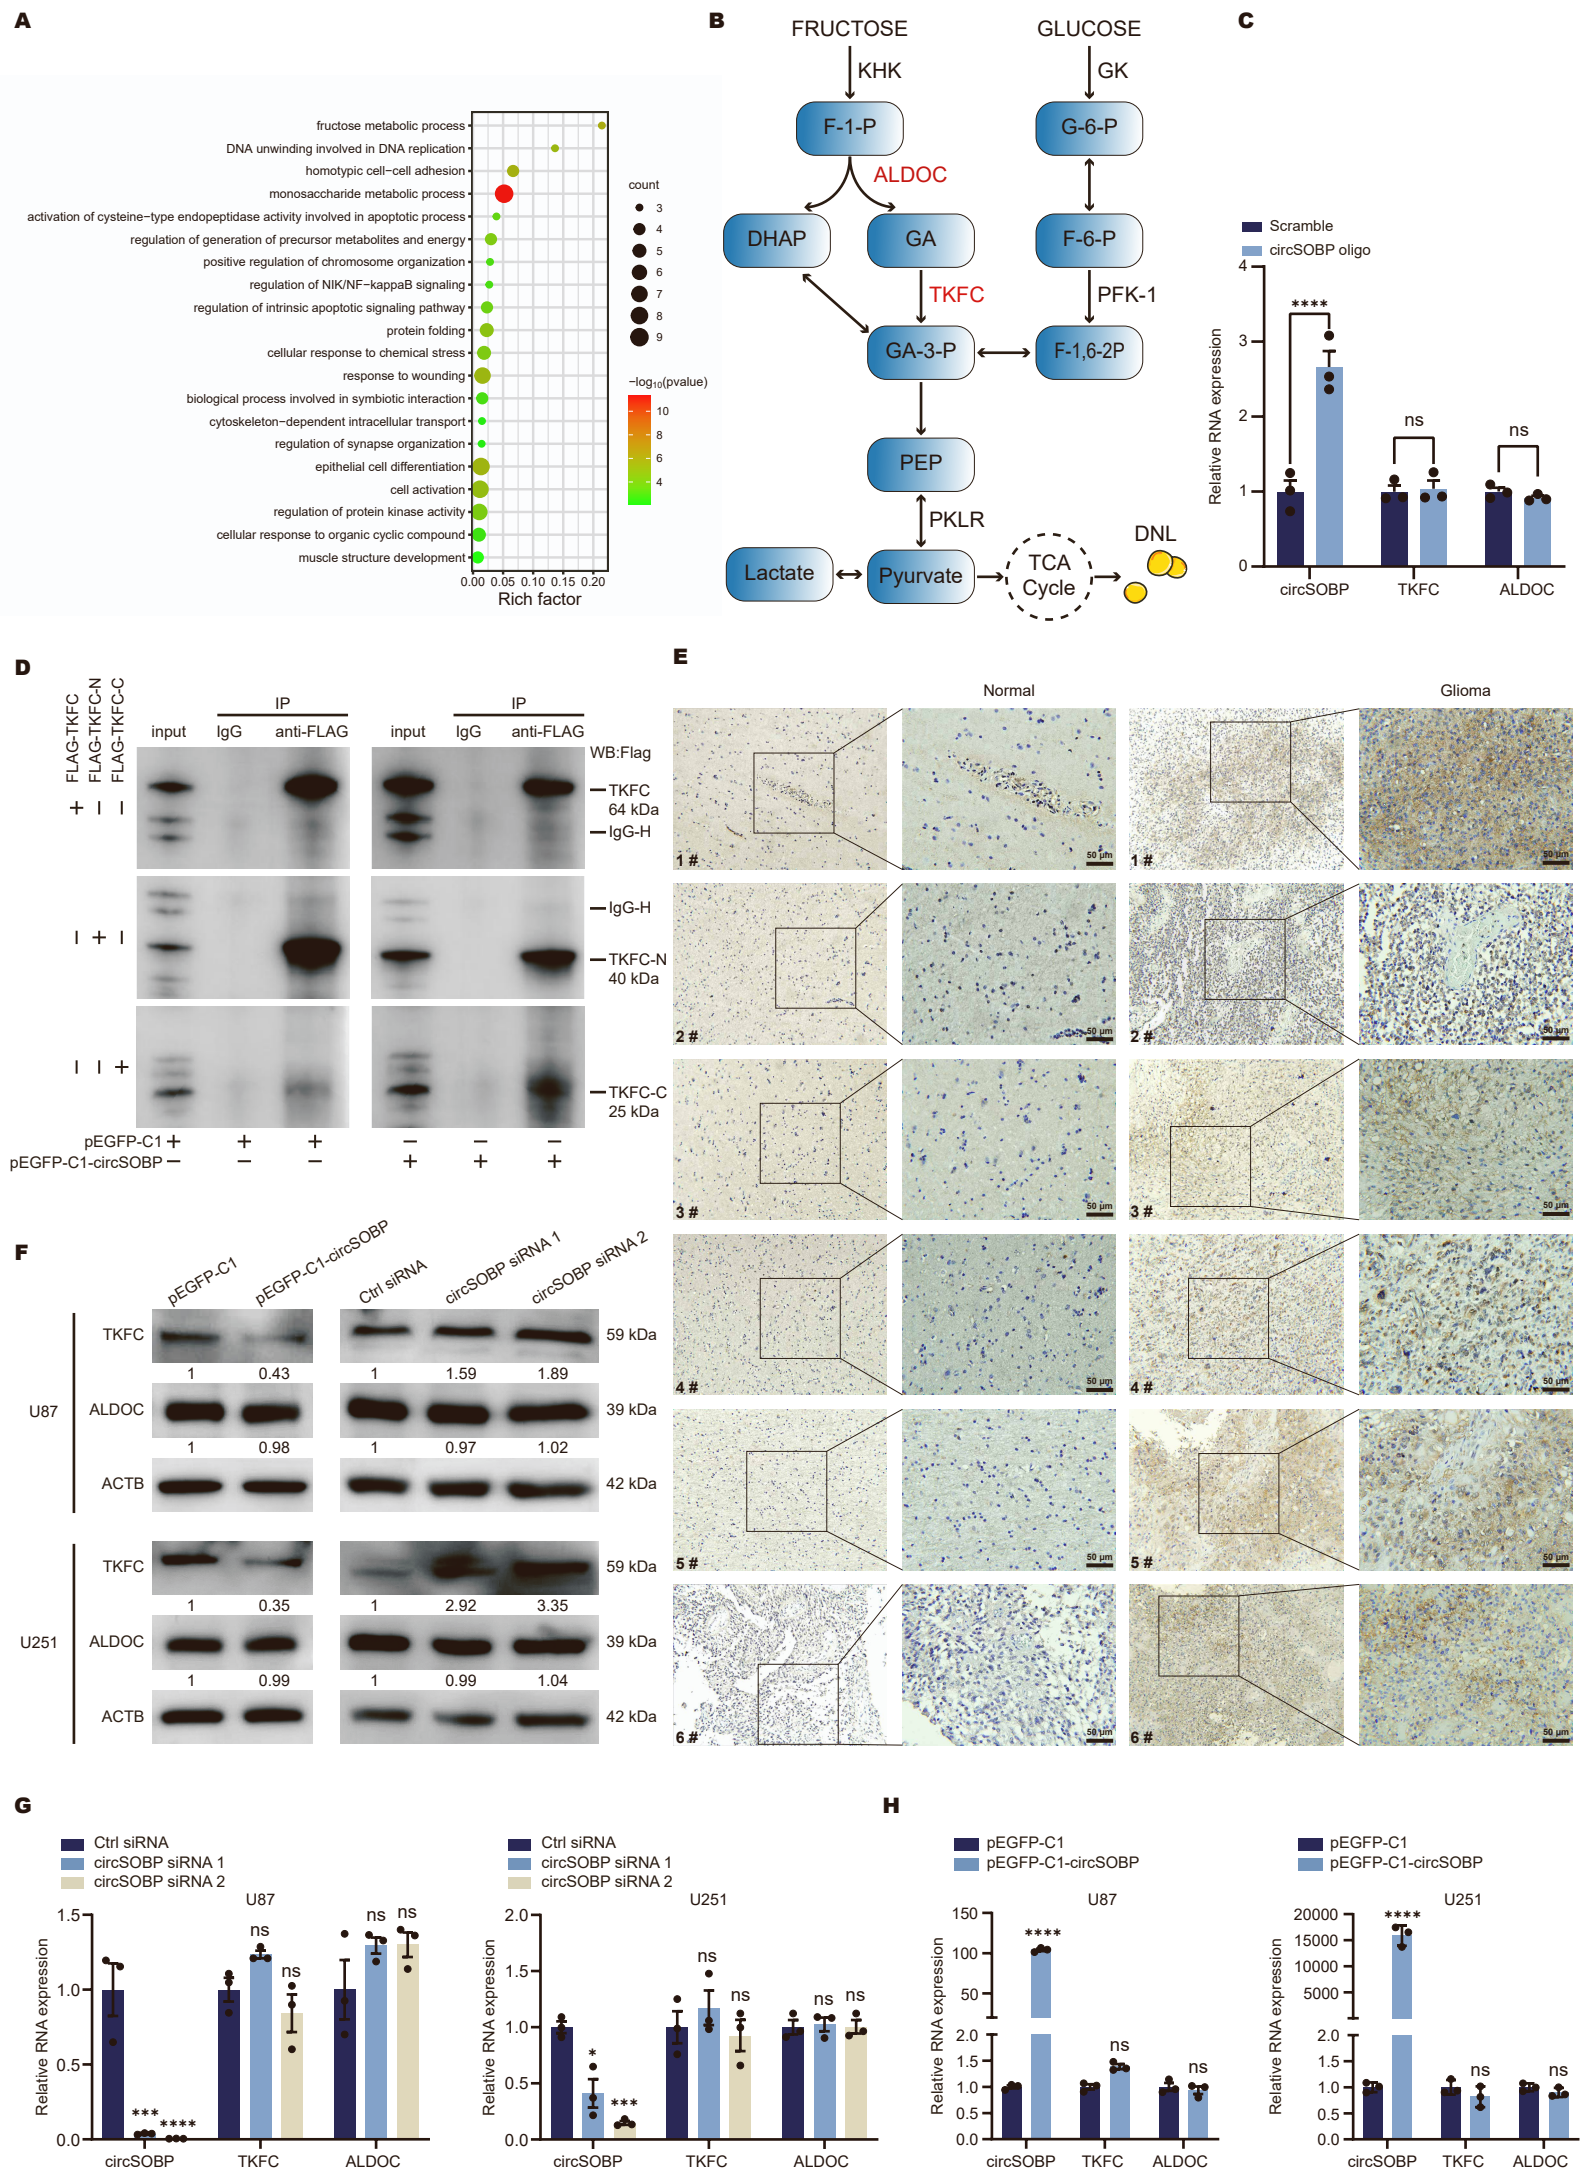

**Figure. S4 CircSOBP is primarily associated with the fructose metabolic process and specifically regulates the protein levels of TKFC. Related to Figures 3 and 4. (A)** GO enrichment analysis of protein clusters identified by circSOBP pulldown experiment. **(B)** TKFC regulates fructose metabolism. **(C)** RT-qPCR analysis of transcript levels of target proteins in circSOBP pulldown products. **(D)** Western blotting showed the validity of exogenously expressed full-length TKFC and multiple truncated forms of RIP assays. **(E)** IHC staining showed TKFC expression in glioma tissues and normal brain tissues. Scale bars, 50  $\mu$ m. **(F-H)** Quantitative analysis of target protein expression levels after circSOBP silencing or overexpression. Data in **(F)** suggest protein levels. Data in **(G and H)** suggest RNA levels. All statistics of error bars, S.E.M. from three independent experiments. NS, not significant; \*P < 0.05; \*\*\*P < 0.001; \*\*\*\*p < 0.0001 by two-tailed Student's t test. Normalized by the value of the control group.



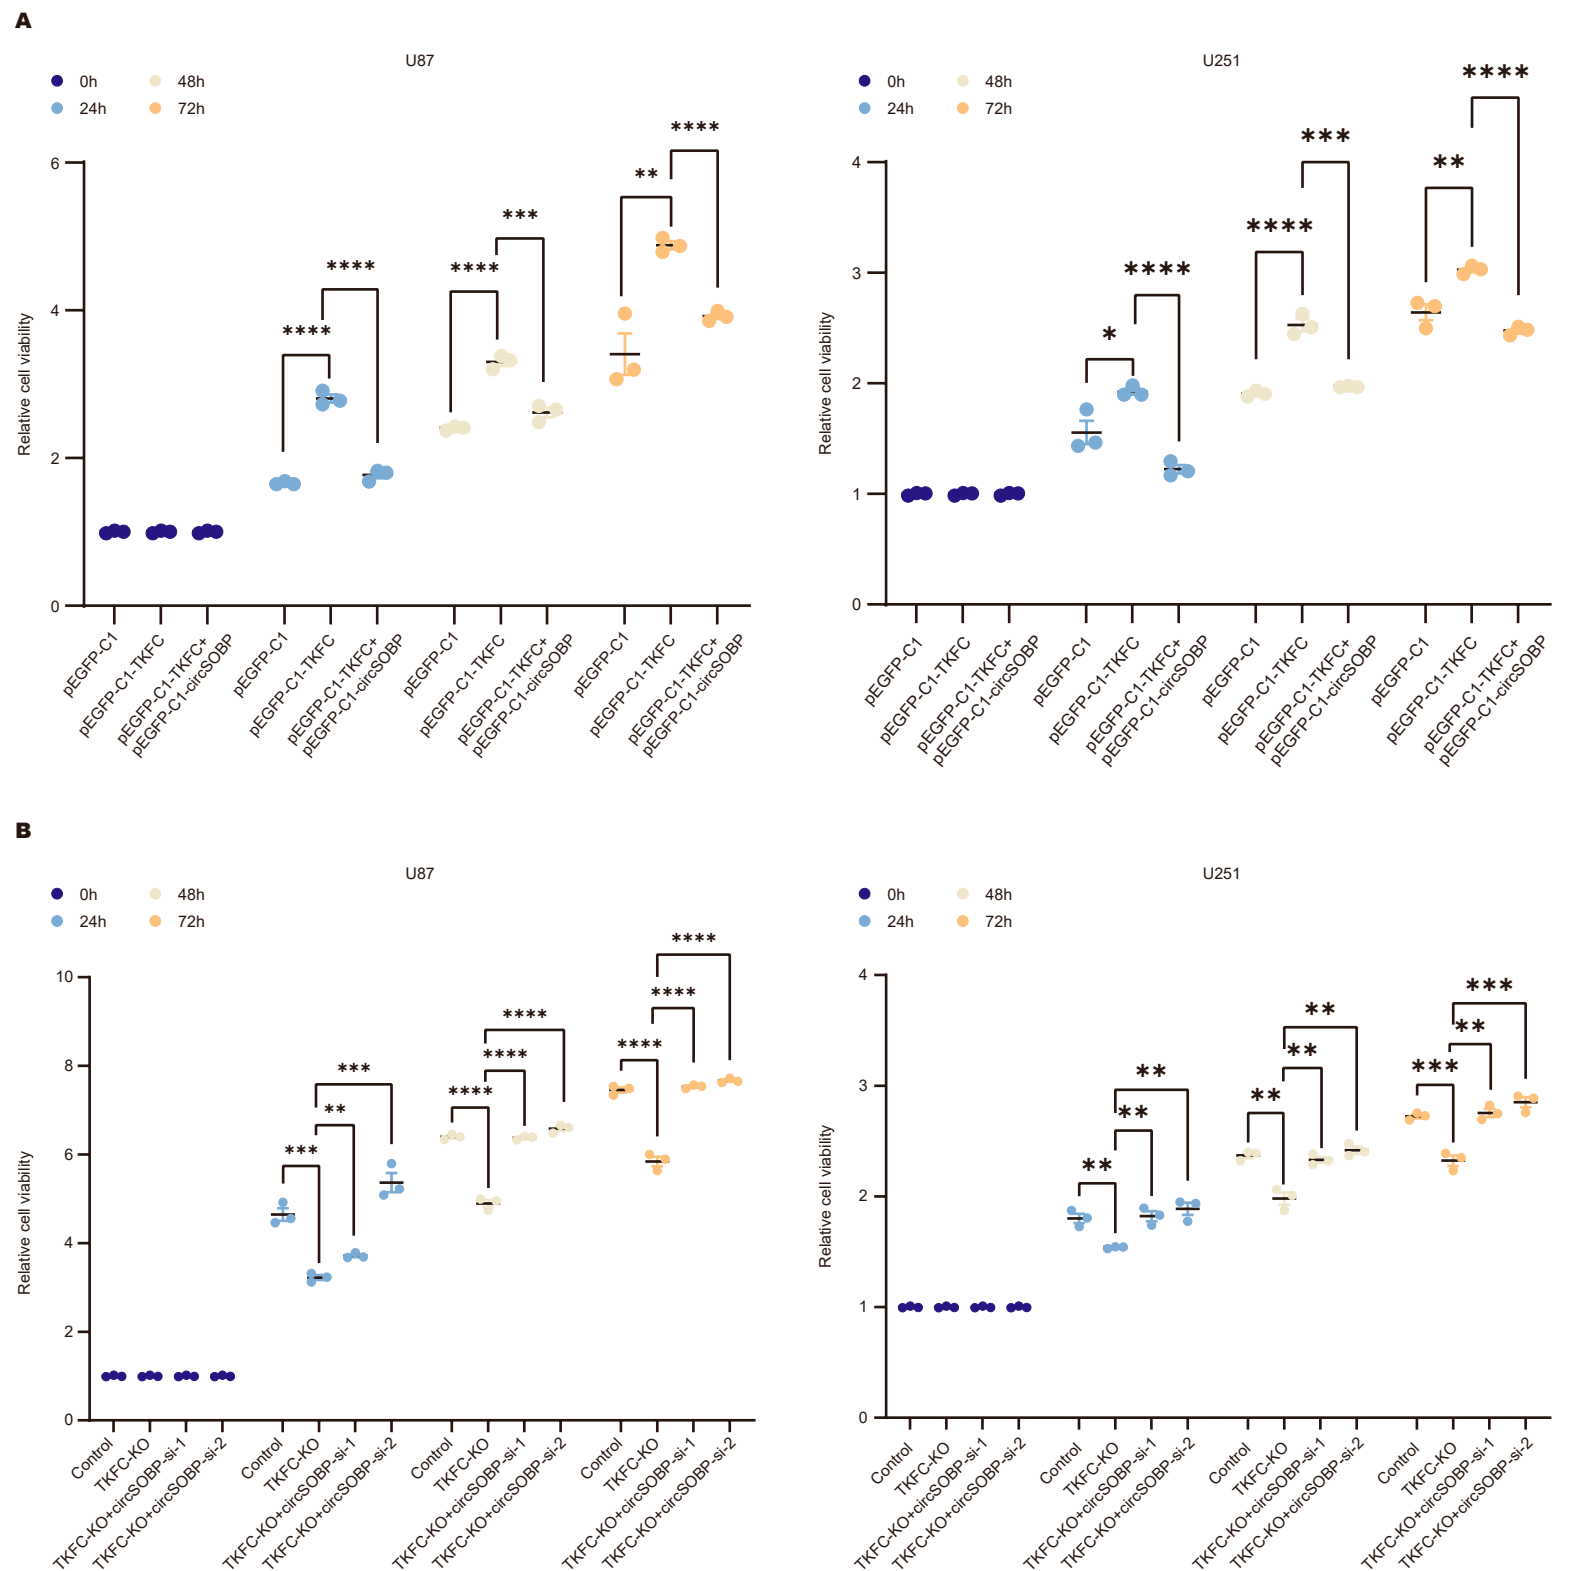

**Figure. S5 CircSOBP reverses the promotion effect of TKFC on glioma cell proliferation. Related to Figure 5. (A)**

Cell viability was detected at 0 h, 24 h, 48 h, and 72 h after transfection with TKFC expression plasmids alone or co-transfection with circSOBP. **(B)** TKFC knockdown alone or co-transfection of circSOBP siRNAs in U87 and U251 cells were analyzed by transwell cell viability assay. All statistics of error bars, S.E.M. from three independent experiments. \*P < 0.05; \*\*P < 0.01; \*\*\*P < 0.001; \*\*\*\*p < 0.0001 by two-tailed Student's t test. Normalized by the value of the control group.



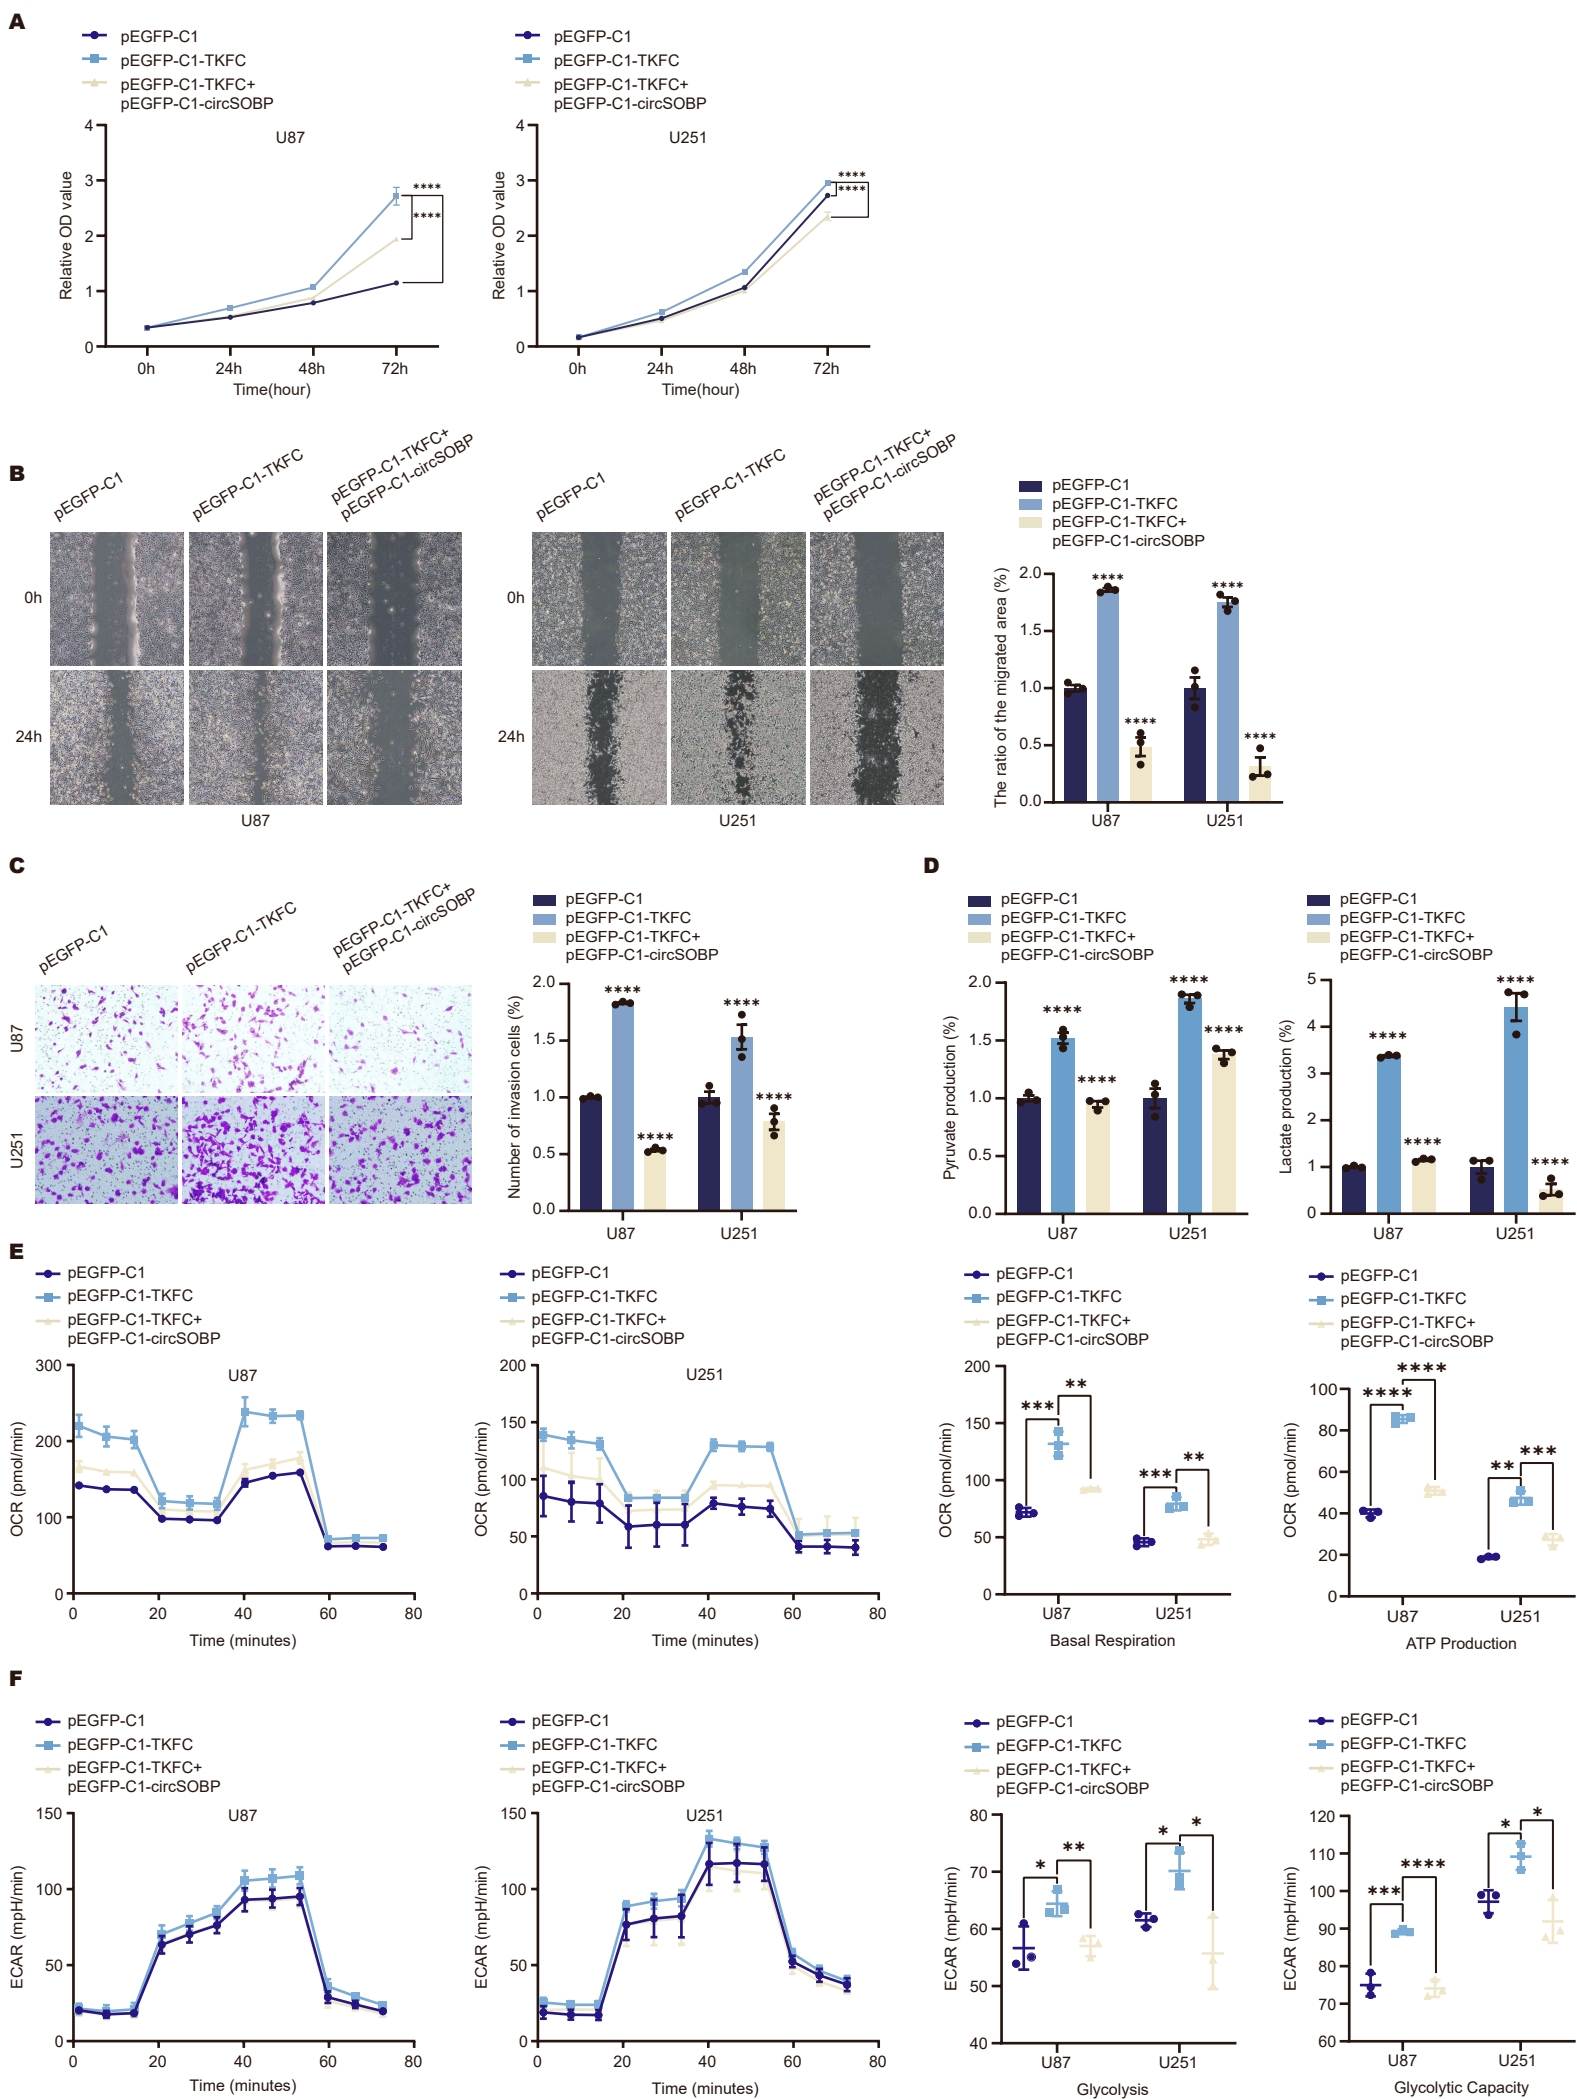

**Figure. S6 Ectopic expression of circSOBP reverses the pro-cancer effect of TKFC. Related to Figure 5. (A)** CCK-8 assay of TKFC expression plasmids transfected alone or co-transfected with circSOBP in U87 and U251 cells. **(B)** Wound-healing analysis of TKFC expression plasmids transfected alone or co-transfected with circSOBP in U87 and U251 cells. **(C)** Transwell assays in U87 and U251 cells transfected with TKFC expression plasmids alone or co-transfection with circSOBP. **(D)** Pyruvate and lactate contents were measured in U87 and U251 cells treatment by TKFC expression plasmids alone or in co-treatment with circSOBP. **(E)** Oxygen consumption rate (OCR) was used as an indicator of oxidative phosphorylation (OXPHOS) to infer basal respiration and ATP production levels to assay cells with TKFC expression plasmids alone or in co-treatment with circSOBP. **(F)** The extracellular acidification rate (ECAR) was used as an indicator to infer glycolytic flux and glycolytic capacity in cells transfected with TKFC expression plasmid alone or co-transfected with circSOBP. All statistics of error bars, S.E.M. from three independent experiments. NS, not significant; \*P < 0.05; \*\*P < 0.01; \*\*\*P < 0.001; \*\*\*\*p < 0.0001 by two-tailed Student's t test. Normalized by the value of the control group.

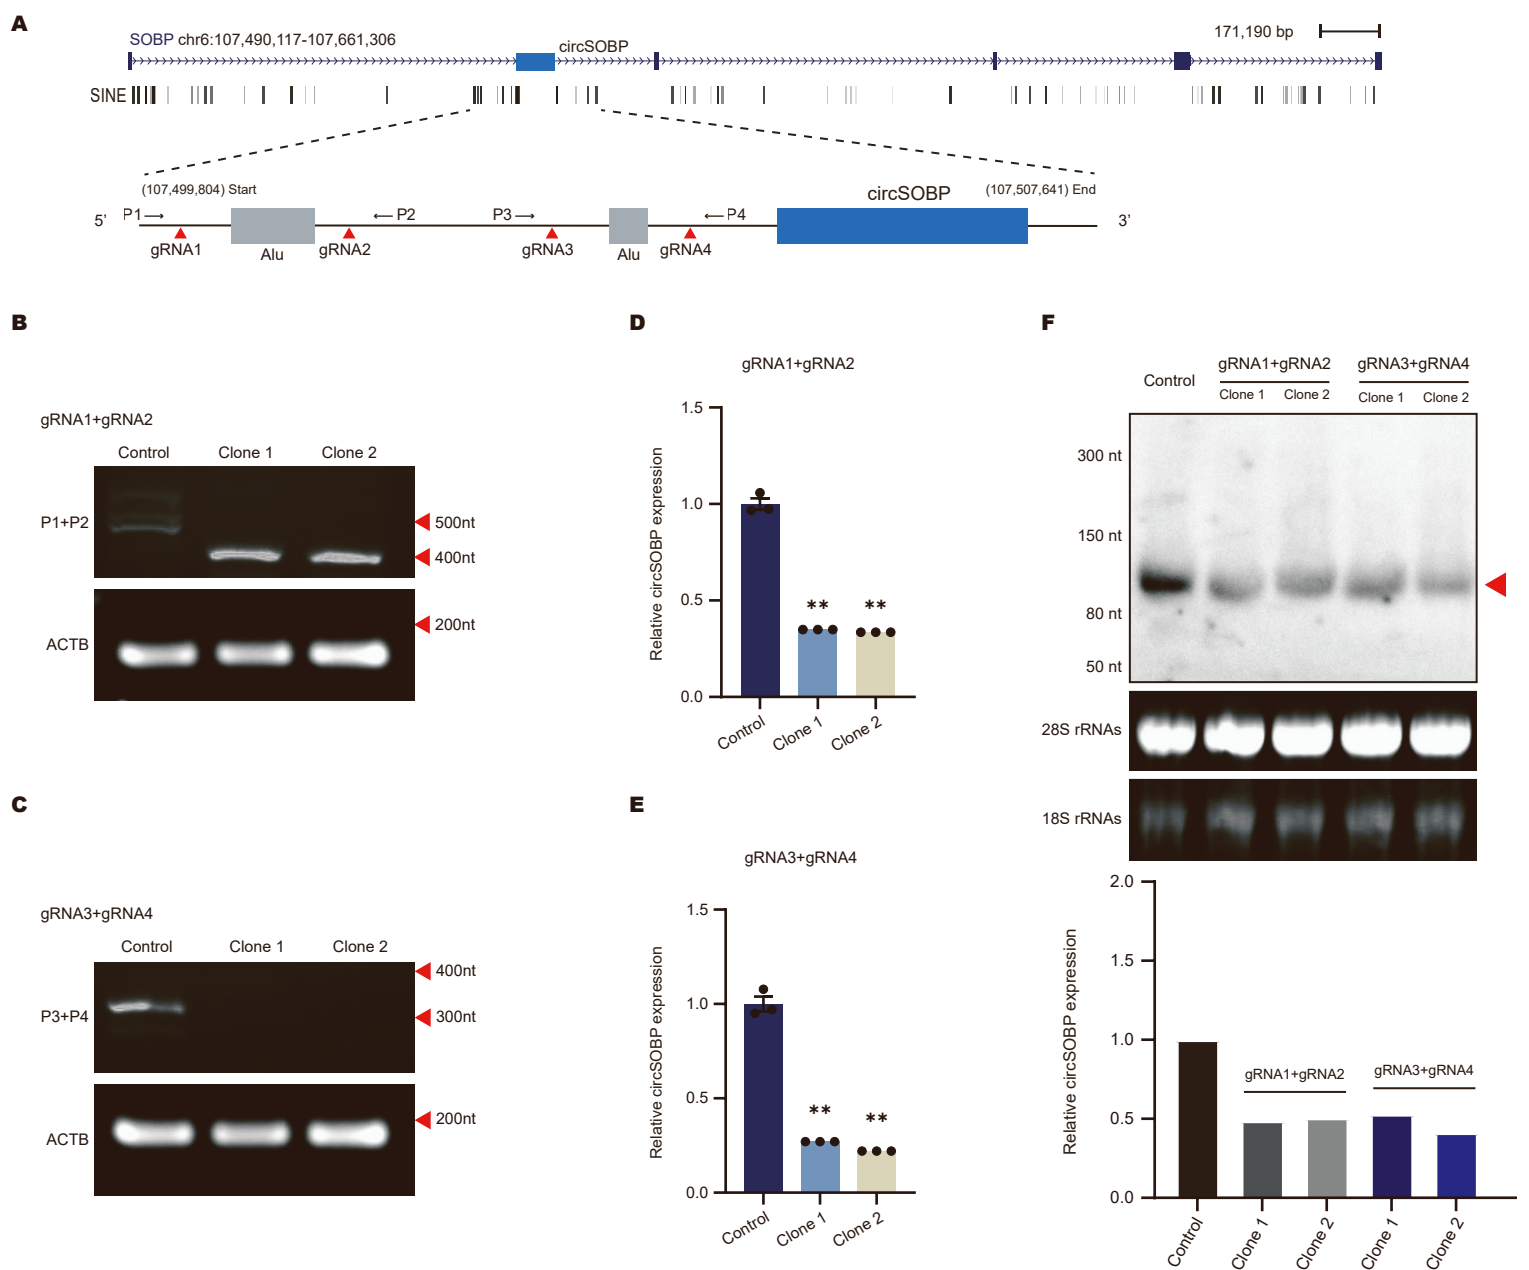

**Figure. S7 The formation of circSOBP is dependent on Alu repetitive sequences. Related to Figure 6. (A)** The diagram shows that the genomic regions of SOBP exons 2 and 3 contain flanking ALU repeats and long introns. ALU elements and long introns were deleted using CRISPR/Cas9 experiments. Specific primers were used to detect the deletion. **(B and C)** PCR data of CRISPR/Cas9-mediated genomic deletions in 293T cells. Two pairs of gRNAs (gRNA1~gRNA2, gRNA3~gRNA4) were used to mediate the deletion of proximal ALU elements. Two monoclonal clones were picked for each group of ALU element deletion. **(D and E)** RT-qPCR analysis of the effect of each pair of gRNAs that mediated the deletion of ALU elements on circSOBP levels. **(F)** Northern blotting and quantitative analysis of 293T cells with stably absent ALU elements in the proximal segment of circSOBP. Control values were used for normalization. Data in **(D and E)** of error bars, S.E.M. from three independent experiments. NS, not significant; \*\* $P < 0.01$  by two-tailed Student's *t* test.

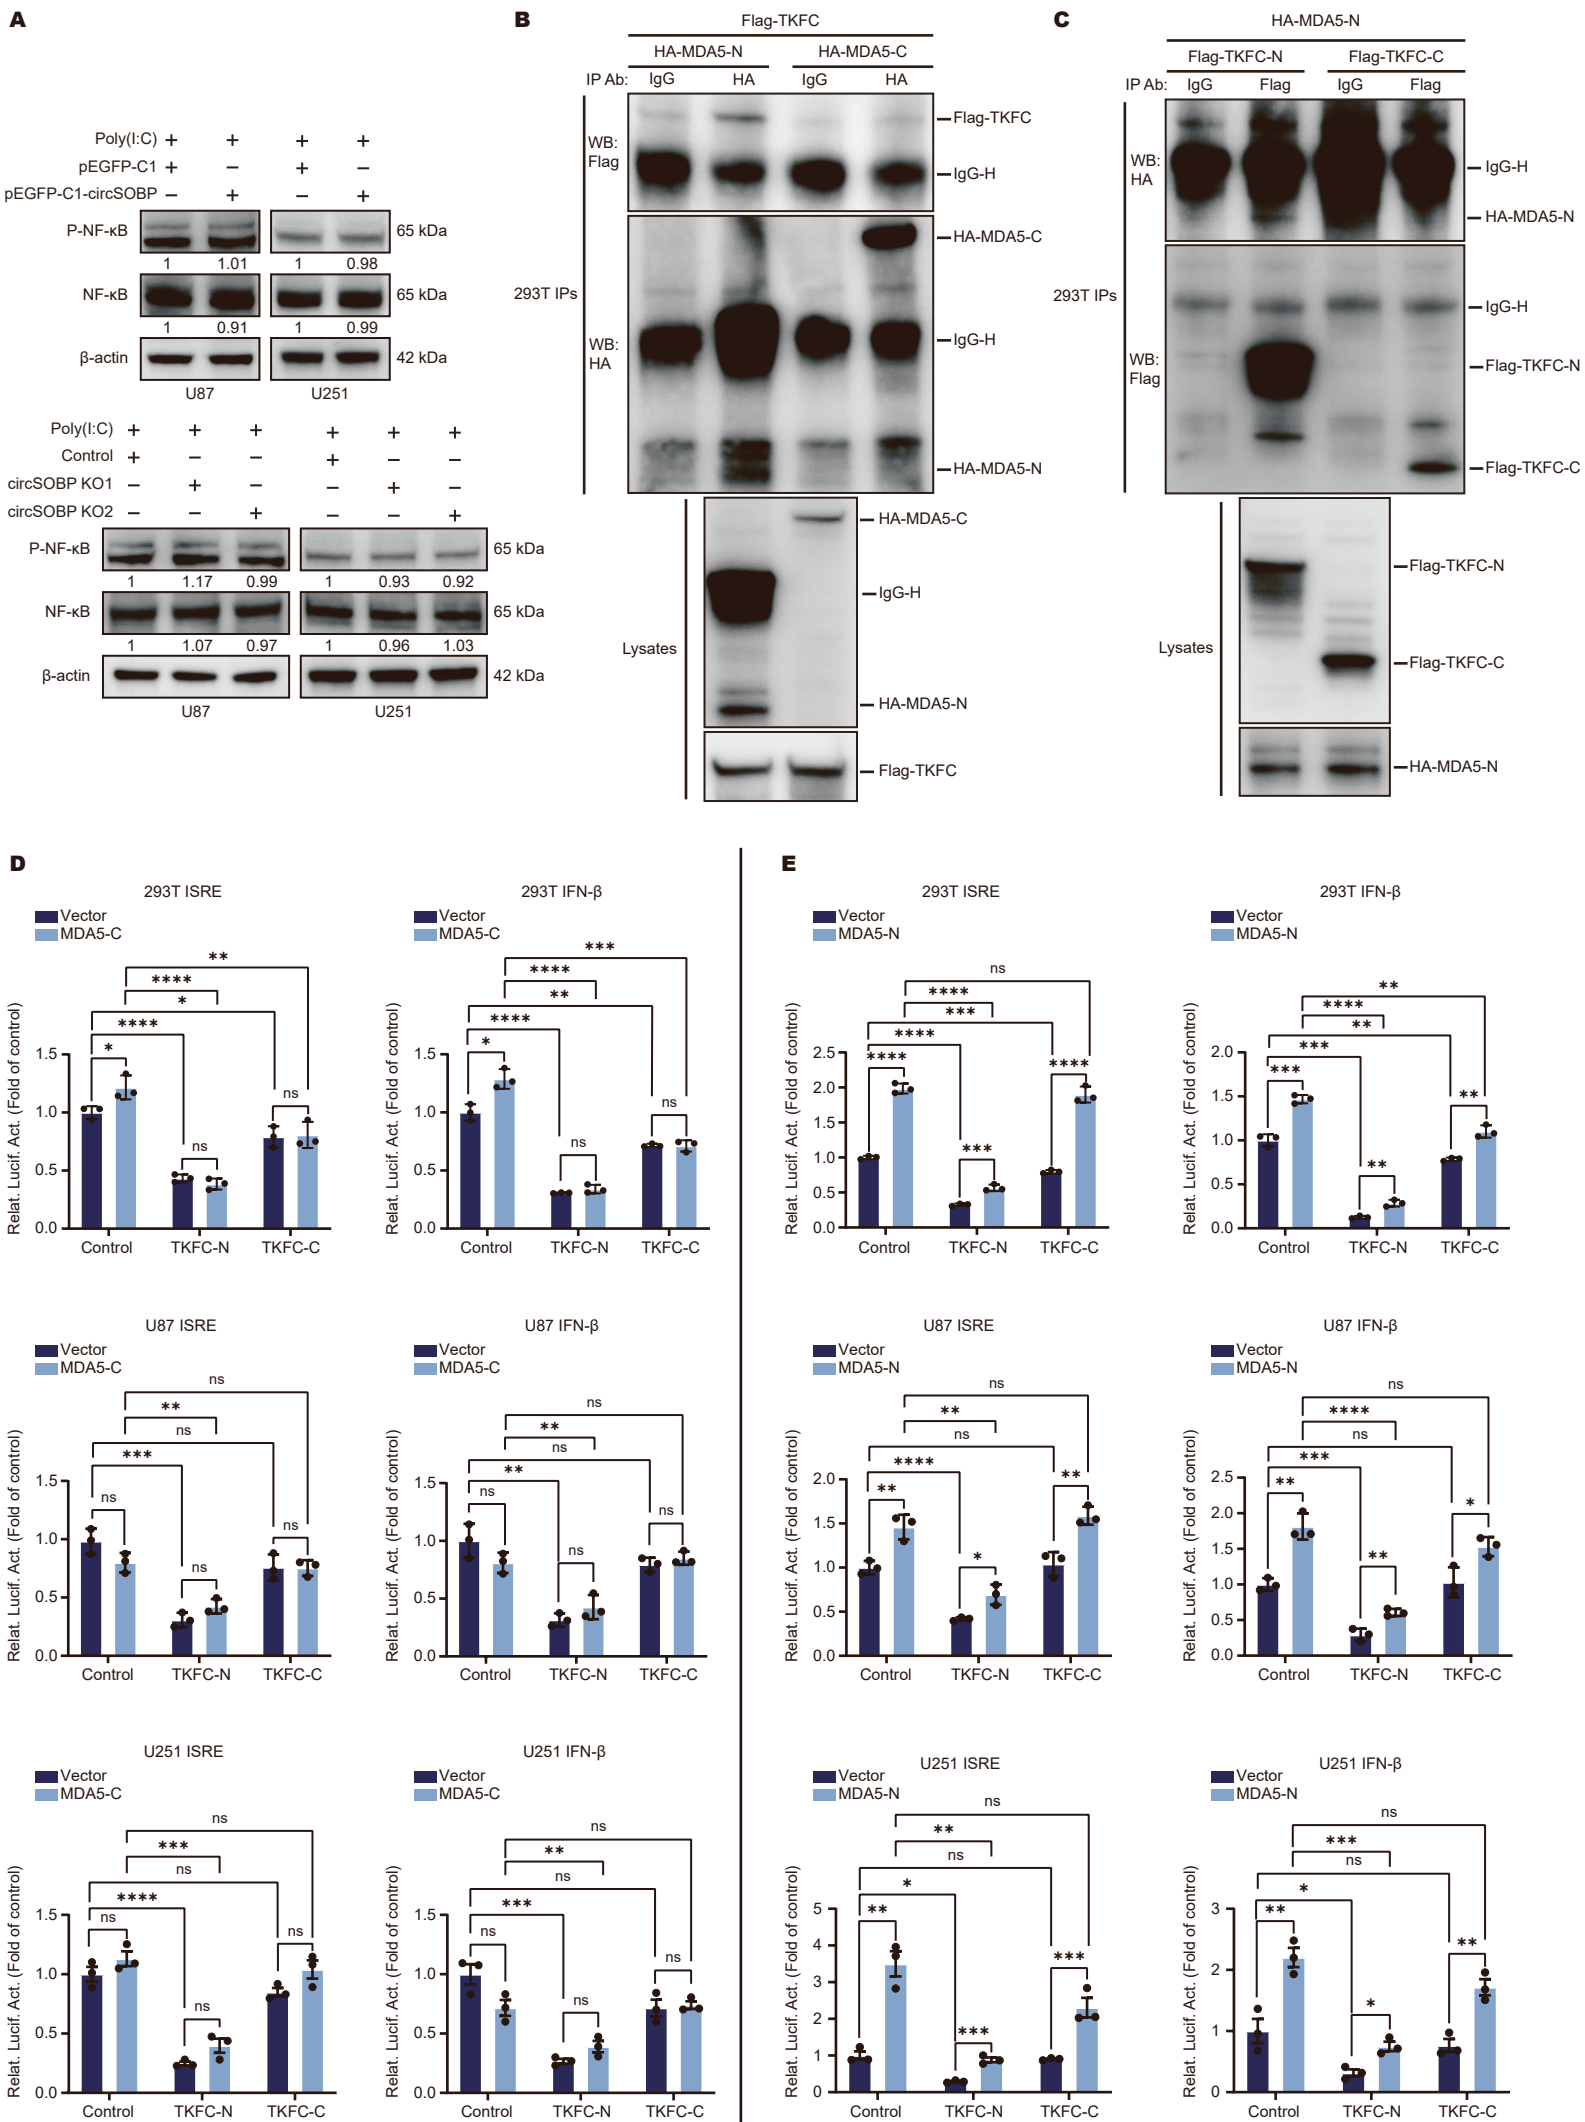

**Figure. S8 TKFC bound to MDA5 and inhibited its activation of type I interferon. Related to Figure 6. (A)** The effects of circSOBP silencing or overexpression on p-NF- $\kappa$ B and NF- $\kappa$ B protein expression in U87 and U251 cells. **(B)** TKFC interacted primarily with the MDA5-N terminus rather than the MDA5-C terminus. 293T cells were co-transfected with the indicated plasmids and cell lysates were immunoprecipitated with anti-HA antibodies or control rabbit IgG. Immunoprecipitates were analyzed by western blotting with anti-FLAG (top) or anti-HA (middle) antibodies. Western blot analysis of transfected protein expression was performed with anti-HA antibody and anti-FLAG antibody (bottom). **(C)** Based on the results of data **(B)**, it was further verified that TKFC and MDA5 bind mainly through the N-terminal of both. **(D)** MDA5-C was not a downstream target of TKFC to inhibit ISRE and IFN promoters activation in 293T and glioma cells. **(E)** TKFC-N inhibited MDA5-N-mediated activation of the ISRE and IFN promoters in 293T and glioma cells. The RLU values obtained from the renilla luciferase were used for normalization. All statistics of error bars, S.E.M. from three independent experiments. NS, not significant; \*P < 0.05; \*\*P < 0.01; \*\*\*P < 0.001; \*\*\*\*p < 0.0001 by two-tailed Student's t test. Normalized by the value of the control group.



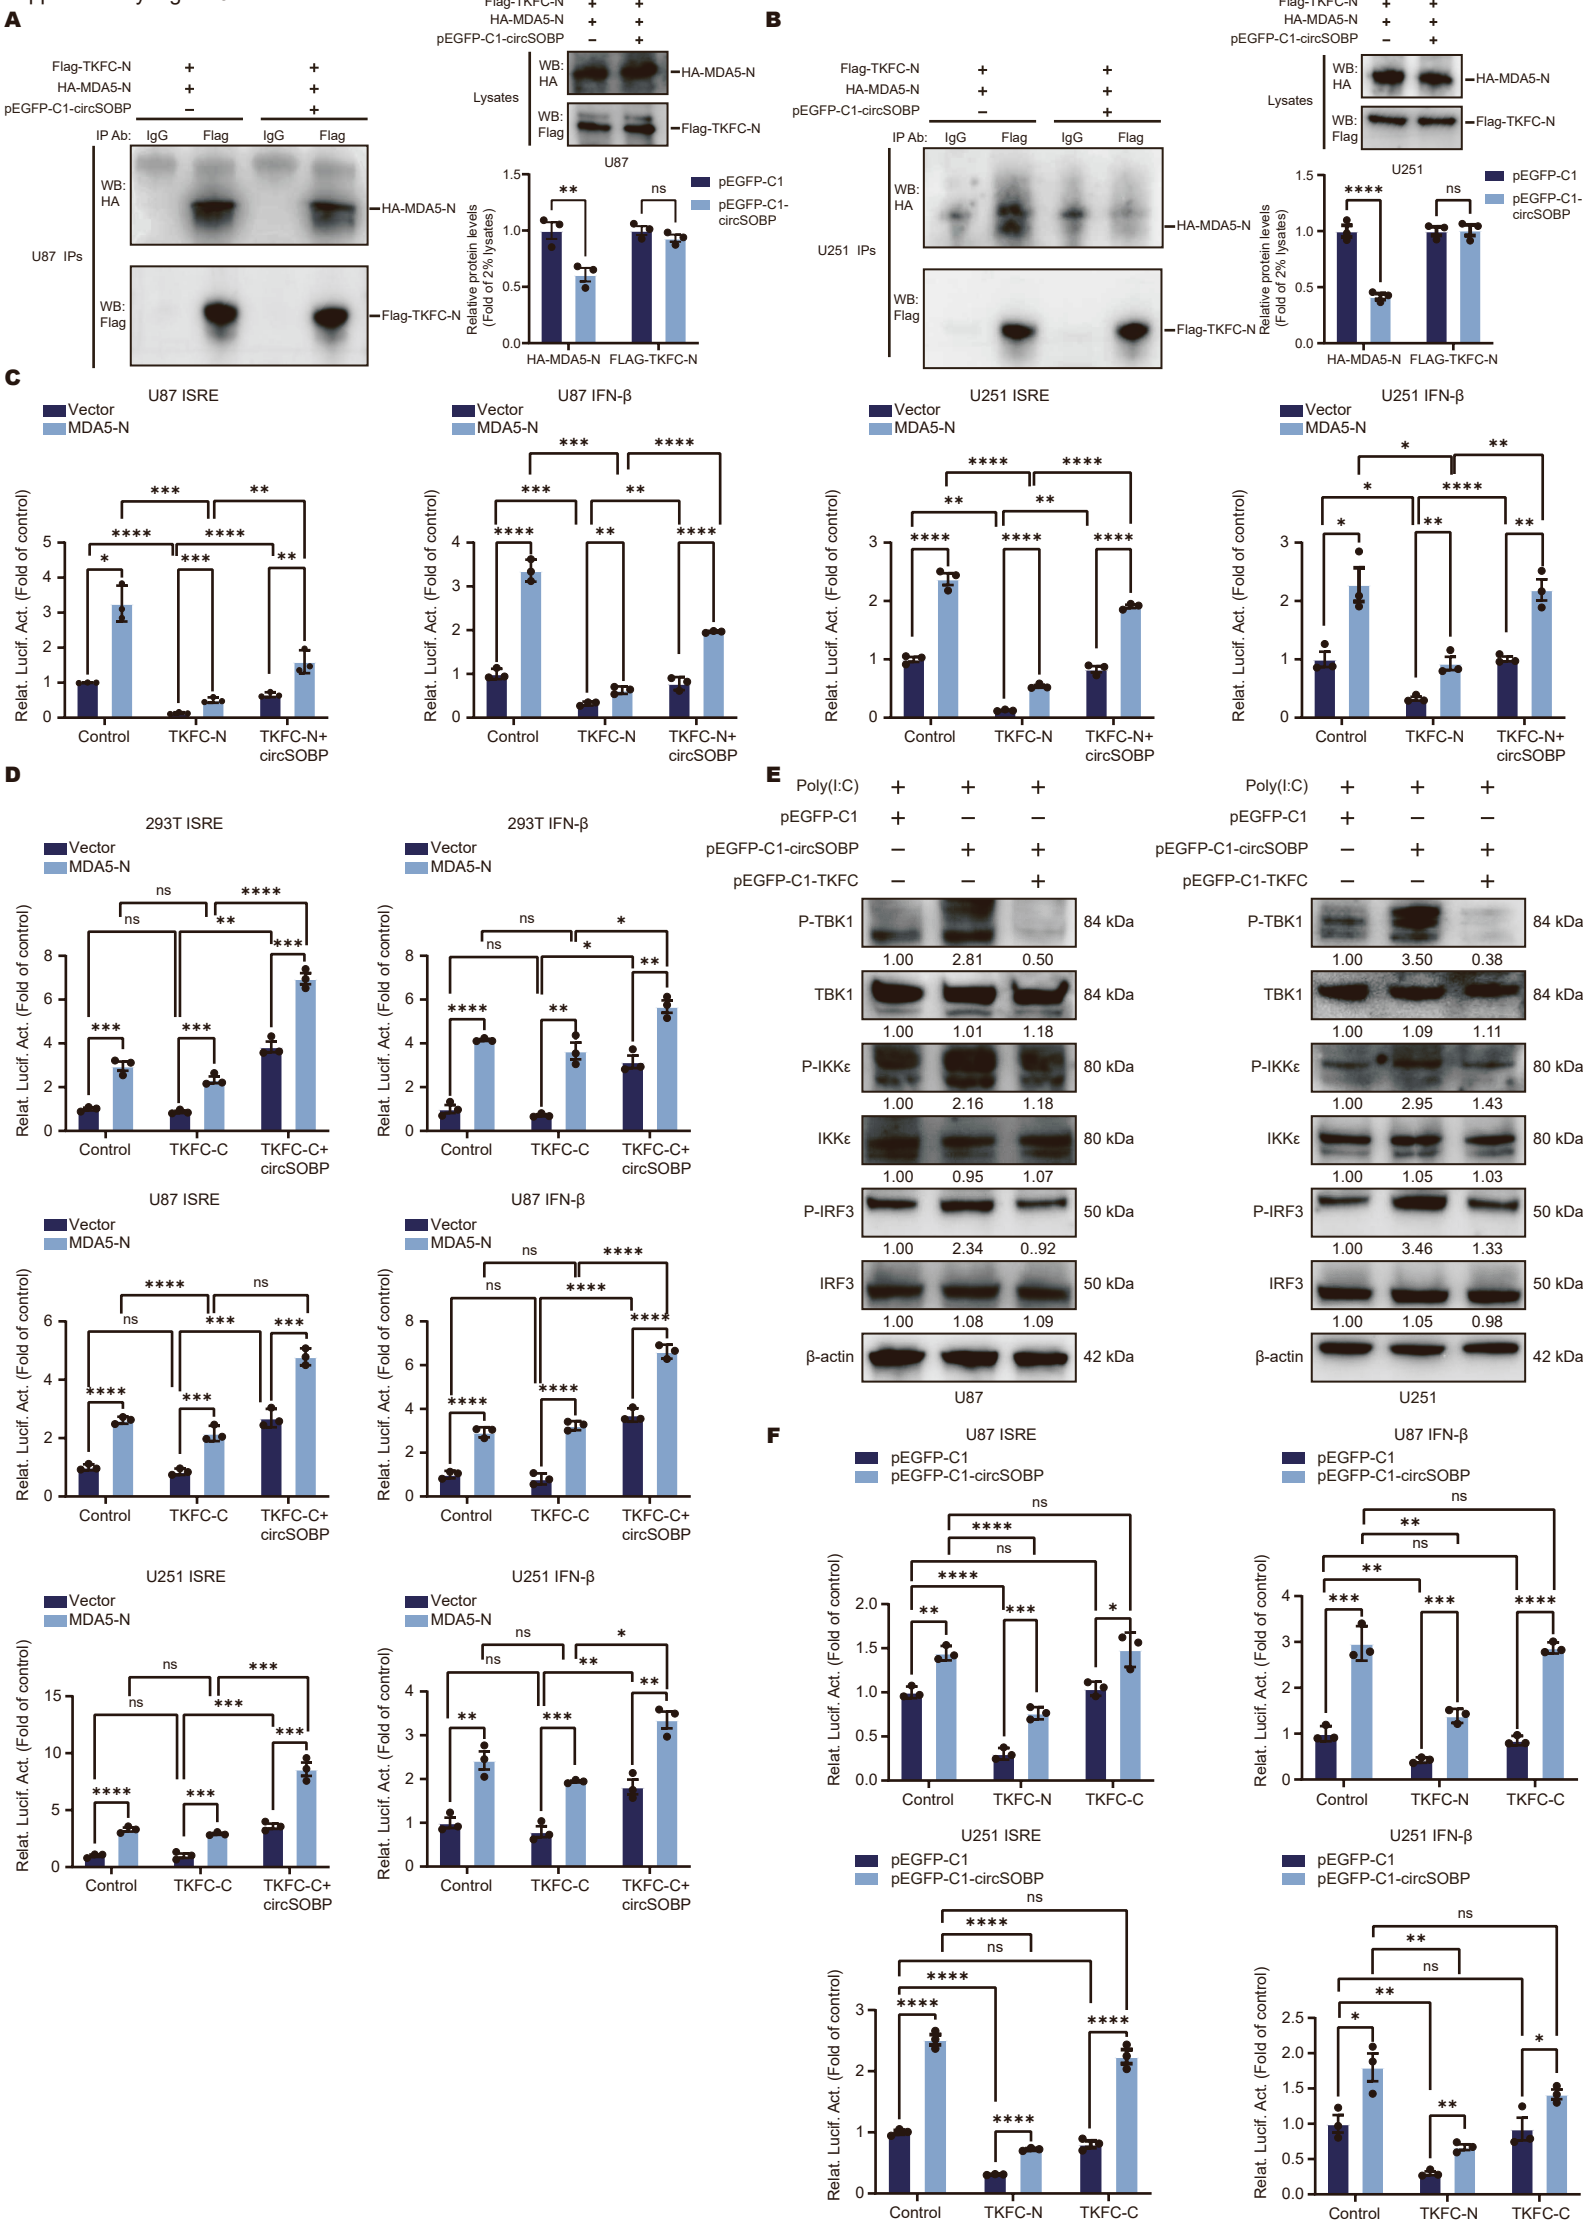

**Figure. S9 CircSOBP disrupts TKFC binding to MDA5 and promotes type I interferon transcription. Related to Figure 6. (A-B)** CircSOBP disrupted the binding between TKFC-N and MDA5-N. The indicated plasmids were co-transfected in U87 and U251 cells and cell lysates were immunoprecipitated with anti-FLAG antibody or control rabbit IgG. Immunoprecipitations were analyzed by western blotting with anti-HA (top) or anti-FLAG (bottom) antibodies. Western blot results of anti-HA and anti-FLAG antibodies in Lysates were used to do normalized to analyze the expression of transfected proteins. **(C)** Dual luciferase reporter assay showed circSOBP rescued TKFC-N to inhibit MDA5-N-mediated activation of ISRE and IFN promoters in U87 and U251 cells. **(D)** Dual luciferase reporter assay showed circSOBP rescued TKFC-C to inhibit MDA5-N-mediated activation of ISRE and IFN promoters in 293T and glioma cells. **(E)** Expression levels of RIG-I-like receptor signaling pathway proteins in U87 and U251 cells transfected with TKFC expression plasmids alone or co-transfected with circSOBP. **(F)** Effect of circSOBP on TKFC-N and TKFC-C to suppress ISRE and IFN promoter activation in U87 and U251 cells. The RLU values obtained from the renilla luciferase were used for normalization. All statistics of error bars, S.E.M. from three independent experiments. NS, not significant; \*P < 0.05; \*\*P < 0.01; \*\*\*P < 0.001; \*\*\*\*p < 0.0001 by two-tailed Student's t test. Normalized by the value of the control group.

A

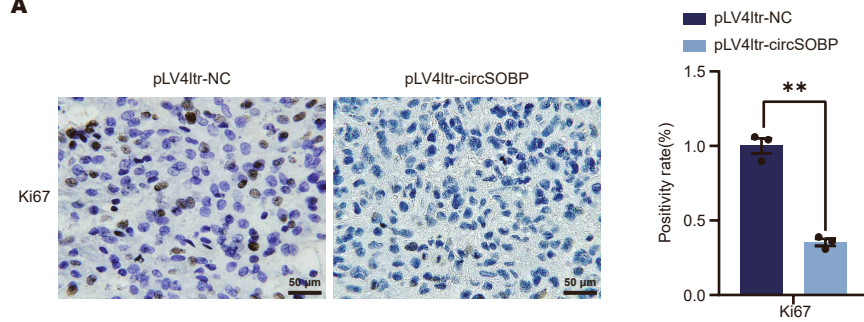

B

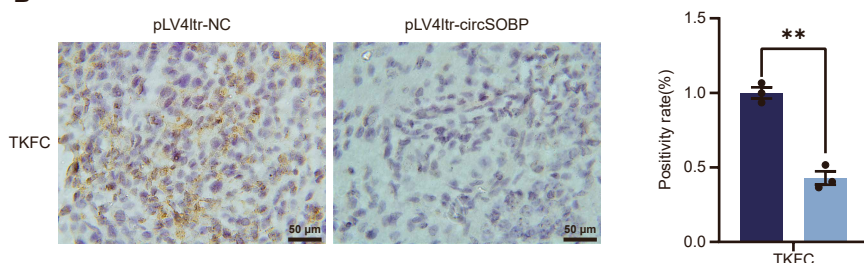

D

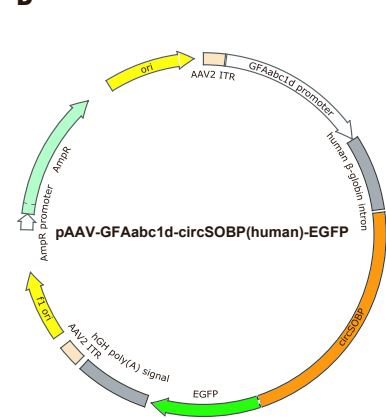

E

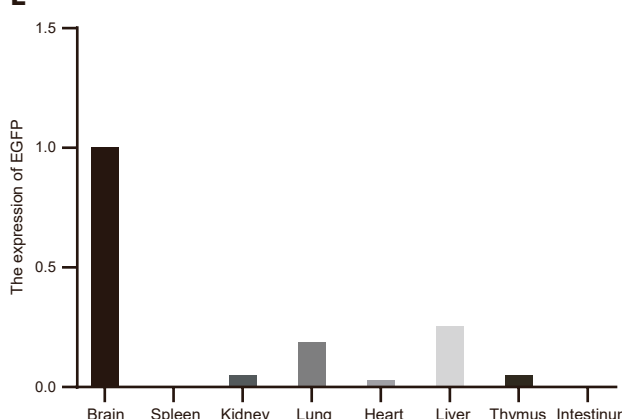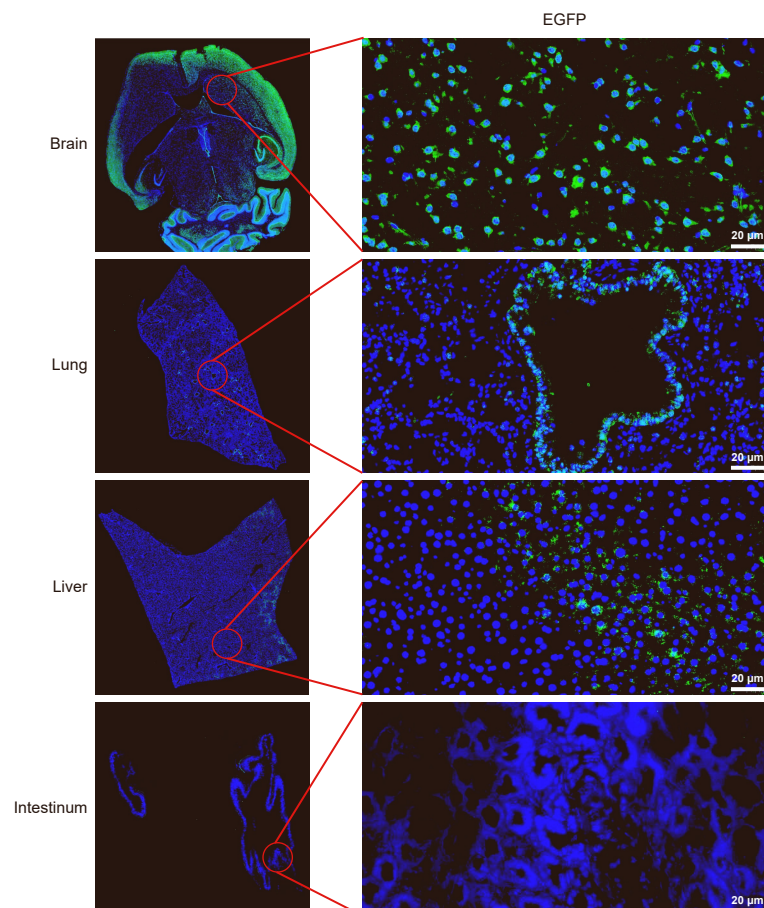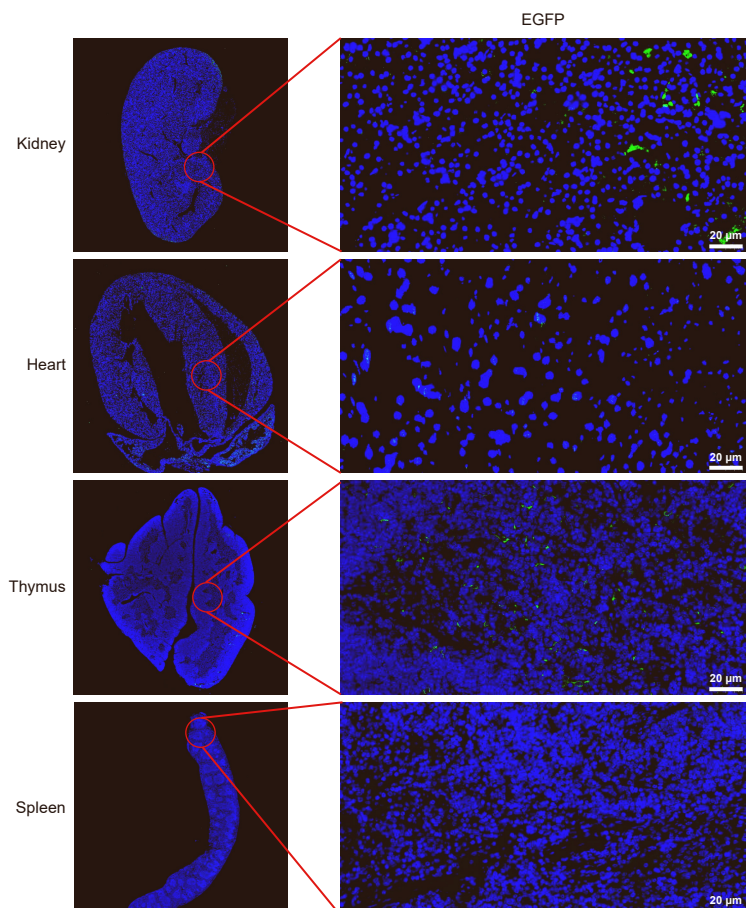

C

circSOBP Homology Identity=93.23%

|                  |                                          |     |
|------------------|------------------------------------------|-----|
| hsa_circ_0001633 | AACCTTGCAGAAAACACCATGAATGAACCTCTGGCTGGG  | 40  |
| mmu_circ_0002223 | AACCTTGCAGAAAACACCATGAATGAACCTCTGGCTGGG  | 40  |
| Consensus        | aaccttgcagaaaacacccatgaatgaacctctggctggg |     |
| hsa_circ_0001633 | ATGGCTATGATAACTGTGAATTAAGAAGTGTGGATATTA  | 80  |
| mmu_circ_0002223 | ATGGCTATGATAACTGTGAATTAAGAAGTGTGGATATTA  | 80  |
| Consensus        | atggctatgataaactgtgaattaaagaagtgtggatata |     |
| hsa_circ_0001633 | AGAAITCAGAGCTACCTACAGATGCAGAGCCGGCAG     | 120 |
| mmu_circ_0002223 | AGAAITCAGAGCTACCTACAGATGCAGAGCCGGCAG     | 120 |
| Consensus        | agaaitcagagctacctacagatgcagagccggcag     |     |
| hsa_circ_0001633 | CACATTTCTGTTCTCAAAAGAAAATCTTTGCCAAAACCA  | 160 |
| mmu_circ_0002223 | CACATTTCTGTTCTCAAAAGAAAATCTTTGCCAAAACCA  | 160 |
| Consensus        | cacatcttctgttctcaaaagaaaatctttgccaaaacca |     |
| hsa_circ_0001633 | AATTACCGAGGACAGTGTATTTCCTACAAATATAG      | 200 |
| mmu_circ_0002223 | AATTACCGAGGACAGTGTATTTCCTACAAATATAG      | 200 |
| Consensus        | aattaccgaggacagtgtatttccctacaatatag      |     |
| hsa_circ_0001633 | CACAGGCTACACAGCTTCCACTCGAATGGACTCAG      | 240 |
| mmu_circ_0002223 | CACAGGCTACACAGCTTCCACTCGAATGGACTCAG      | 240 |
| Consensus        | cacaggctacacagcttccactcgaatggactcag      |     |
| hsa_circ_0001633 | GACTCACCTCGGGGTCAAAGGCAATGCCAGTGC        | 280 |
| mmu_circ_0002223 | GACTCACCTCGGGGTCAAAGGCAATGCCAGTGC        | 280 |
| Consensus        | gactcacctcggggtcaaaggcaatgccagtgc        |     |
| hsa_circ_0001633 | TTATTCTGCTTTAAATCCACCACCTTTATAAAGCC      | 320 |
| mmu_circ_0002223 | TTATTCTGCTTTAAATCCACCACCTTTATAAAGCC      | 320 |
| Consensus        | ttatttctgcttttaaatccaccacctttataaagcc    |     |
| hsa_circ_0001633 | AGCAC                                    | 325 |
| mmu_circ_0002223 | AGCAC                                    | 325 |
| Consensus        | agcac                                    |     |

TKFC Homology Identity=84.95%

|                     |                                            |     |
|---------------------|--------------------------------------------|-----|
| Q3LXA3   TKFC_HUMAN | DLRSKLVNSVGCADDLAGLVAANPDLQLQGRVVALRS      | 40  |
| Q8VC30   TKFC_MOUSE | DLRSKLVNSVGCADDLAGLVAANPDLQLQGRVVALRS      | 40  |
| Consensus           | mskklvnsavgaddlaaglvacnpdlqlqgrvvalrs      |     |
| Q3LXA3   TKFC_HUMAN | DLSLKGKRVALLSGGSGHEPAHAGFIGKMLTGVIAAGV     | 80  |
| Q8VC30   TKFC_MOUSE | DLSLKGKRVALLSGGSGHEPAHAGFIGKMLTGVIAAGV     | 80  |
| Consensus           | dldslkgkrvallsggsghepahagfigkmltgviaagv    |     |
| Q3LXA3   TKFC_HUMAN | PLSIVGSLIAAFAVAAGTGTGTLIVKNVTDGRLNEGL      | 120 |
| Q8VC30   TKFC_MOUSE | PLSIVGSLIAAFAVAAGTGTGTLIVKNVTDGRLNEGL      | 120 |
| Consensus           | faspavgsliaaifavaagtgvtgllivknvtdgrlnegl   |     |
| Q3LXA3   TKFC_HUMAN | PLSIVGSLIAAFAVAAGTGTGTLIVKNVTDGRLNEGL      | 160 |
| Q8VC30   TKFC_MOUSE | PLSIVGSLIAAFAVAAGTGTGTLIVKNVTDGRLNEGL      | 160 |
| Consensus           | ameqakaegipvemiieddsaftvlkkagrqlcgtvli     |     |
| Q3LXA3   TKFC_HUMAN | HKVAGALAAAGLEELIPLAARLAKMNTLGVLSLSSCSV     | 200 |
| Q8VC30   TKFC_MOUSE | HKVAGALAAAGLEELIPLAARLAKMNTLGVLSLSSCSV     | 200 |
| Consensus           | hkvagalaagmgleeliaqkvnvialkamntlglvlsescsv |     |
| Q3LXA3   TKFC_HUMAN | PLSIVGSLIAAFAVAAGTGTGTLIVKNVTDGRLNEGL      | 240 |
| Q8VC30   TKFC_MOUSE | PLSIVGSLIAAFAVAAGTGTGTLIVKNVTDGRLNEGL      | 240 |
| Consensus           | pskklvnsavgaddlaaglvacnpdlqlqgrvvalrs      |     |
| Q3LXA3   TKFC_HUMAN | MLDHMTNPLNLSRVPVCGSSVVMVNNLGGSLFLELGI      | 280 |
| Q8VC30   TKFC_MOUSE | MLDHMTNPLNLSRVPVCGSSVVMVNNLGGSLFLELGI      | 280 |
| Consensus           | mldhmntnplnlsrvpvcgssvvmvnnlggslflelgi     |     |
| Q3LXA3   TKFC_HUMAN | ADAIRLEGRGVARALVGFMSALEMPCSLTILVLD         | 320 |
| Q8VC30   TKFC_MOUSE | ADAIRLEGRGVARALVGFMSALEMPCSLTILVLD         | 320 |
| Consensus           | adaairilegrgvkialrlygtfmsalempgslitlilvd   |     |
| Q3LXA3   TKFC_HUMAN | EPLKLLIDAEETAAWPHAVNSVGRKRSFATPEEPA        | 360 |
| Q8VC30   TKFC_MOUSE | EPLKLLIDAEETAAWPHAVNSVGRKRSFATPEEPA        | 360 |
| Consensus           | eplllkllidaettaawphmavnsvtgrkrfsatpappa    |     |
| Q3LXA3   TKFC_HUMAN | PLSIVGSLIAAFAVAAGTGTGTLIVKNVTDGRLNEGL      | 400 |
| Q8VC30   TKFC_MOUSE | PLSIVGSLIAAFAVAAGTGTGTLIVKNVTDGRLNEGL      | 400 |
| Consensus           | pdtaaggsaakqmalvldricstlliglehnaldraag     |     |
| Q3LXA3   TKFC_HUMAN | GDGCHTHSRAAATCCMLKEGHPSPACLSLSVLLLI        | 440 |
| Q8VC30   TKFC_MOUSE | GDGCHTHSRAAATCCMLKEGHPSPACLSLSVLLLI        | 440 |
| Consensus           | gdgchthsrakaigewlkegppiaespaqlskslvllli    |     |
| Q3LXA3   TKFC_HUMAN | PLMGGSSGALVGLFLTAARQPLKARTLSLSAMADAGLE     | 480 |
| Q8VC30   TKFC_MOUSE | PLMGGSSGALVGLFLTAARQPLKARTLSLSAMADAGLE     | 480 |
| Consensus           | ekmgssgalyglfltaaarplkarktllsamsadagle     |     |
| Q3LXA3   TKFC_HUMAN | SMQVYGAAPGDRMTLDSLWAAQEQAWKSPGSLILV        | 520 |
| Q8VC30   TKFC_MOUSE | SMQVYGAAPGDRMTLDSLWAAQEQAWKSPGSLILV        | 520 |
| Consensus           | amqkygkaapgdrtmldslwaaqeqawkspgslilvp      |     |
| Q3LXA3   TKFC_HUMAN | TKAVKSAEAAAATKNMEAGGRASYISSAQLDPPGAV       | 560 |
| Q8VC30   TKFC_MOUSE | TKAVKSAEAAAATKNMEAGGRASYISSAQLDPPGAV       | 560 |
| Consensus           | tkavksaeaaaatknmeaggrasyissaqldppgav       |     |
| Q3LXA3   TKFC_HUMAN | AAAAFRAILEVLVQSGA                          | 575 |
| Q8VC30   TKFC_MOUSE | AAAAFRAILEVLVQSGA                          | 578 |
| Consensus           | aaaalfraillevlqsga                         |     |

**Figure. S10 The effect of circSOBP on glioma *in vivo*. Related to Figure 7 and 8. (A and B)** IHC staining showed the expression levels of Ki67 and TKFC in glioma tissues with lentivirus-mediated circSOBP overexpression. Scale bars, 50  $\mu\text{m}$ . **(C)** Homology analysis of circSOBP or TKFC between human and mouse. **(D)** Schematic diagram showing the construction of an adeno-associated viral shuttle plasmid for specific expression of circSOBP (hsa\_circ\_0001633) in the brain. **(E)** Immunofluorescence (IF) staining was used to analyze the specificity of adeno-associated virus-mediated circSOBP expression in different organs. Scale bars, 20  $\mu\text{m}$ . All statistics of error bars, S.E.M. from three independent experiments. **\*\*P < 0.01** by two-tailed Student's t test. Normalized by the value of the control group.

**Supplementary Table 1 The relationship of circSOBP and clinical characteristics in 94 glioma patients. Related to STAR Methods and Figure 1.**

| Variable               | circSOBP       |               | p-value |
|------------------------|----------------|---------------|---------|
|                        | High<br>(n=47) | Low<br>(n=47) |         |
| Sex                    |                |               | 1.000   |
| Male                   | 24             | 24            |         |
| Female                 | 23             | 23            |         |
| Age(year)              |                |               | 0.804   |
| ≤45                    | 10             | 11            |         |
| >45                    | 37             | 36            |         |
| WHO grade              |                |               | 0.116   |
| Low grade (I-II)       | 12             | 6             |         |
| High grade (III-IV)    | 35             | 41            |         |
| Location               |                |               | 0.211   |
| Frontal                | 27             | 18            |         |
| Parietal               | 2              | 6             |         |
| Occipital              | 4              | 4             |         |
| Temporal               | 14             | 19            |         |
| Recurrence             |                |               | 0.778   |
| NO                     | 39             | 40            |         |
| Yes                    | 8              | 7             |         |
| Histology              |                |               | 0.492   |
| Pilocytic Astrocytoma  | 2              | 1             |         |
| Oligodendroglioma      | 10             | 5             |         |
| Astrocytome            | 2              | 2             |         |
| Anaplastic Astrocytoma | 7              | 5             |         |
| Glioblastoma           | 26             | 34            |         |



**Supplementary Table 4 Oligos used in the study. Related to STAR Methods.**

| Name            | Sequence                                            | Application                   |
|-----------------|-----------------------------------------------------|-------------------------------|
| circSOBP-F      | AGCCATACCAGCCAAGGAGT                                | For circSOBP RT-qPCR          |
| circSOBP-R      | ATGGA CT CAGT GACT CACCT                            |                               |
| SOBP mRNA-F     | AGCAATGGGAGAACTAGACA                                | For SOBP mRNA RT-qPCR         |
| SOBP mRNA-R     | TCCCCAACAGATGATGATCT                                |                               |
| TKFC-F          | GAGGTGCTGCTGCTGCC                                   | For TKFC RT-qPCR              |
| TKFC-R          | CACCGAGTTCACCAGCTTCT                                |                               |
| ALDOC-F         | AGGATAAGGGCATCGTCG                                  | For ALDOC RT-qPCR             |
| ALDOC-R         | GCTGACTTTGCCAAGTGG                                  |                               |
| circSOBP-gRNA-1 | TATCTCGAAAATCTGTCTGC                                | For crispr / cas9 of circSOBP |
| circSOBP-gRNA-2 | TTGGCTTCTTCATACAATAG                                |                               |
| circSOBP-gRNA-3 | AATGGGCTGGCTAGTAACTT                                | For crispr / cas9 of circSOBP |
| circSOBP-gRNA-4 | CGATAAGAGTTATCTTAAGA                                |                               |
| circSOBP-P1     | AGGCAGATATCATAACCTGCC                               | For circSOBP Alu PCR          |
| circSOBP-P2     | AGGGGCAAGATGAAAGAGAGA                               |                               |
| circSOBP-P3     | TGCGAGACAGGAATGTTAAG                                | For circSOBP Alu PCR          |
| circSOBP-P4     | TGCCTATGAACAGGAAGTCAT                               |                               |
| TKFC-gRNA-1     | TATCGTGAAGAACTACTG                                  | For crispr / cas9 of TKFC     |
| TKFC-gRNA-2     | CTGAAGAAGGCAGGCCGGCG                                |                               |
| TKFC-gRNA-3     | GGCCTAACGTGGCTGCAGTC                                | For crispr / cas9 of TKFC     |
| TKFC-gRNA-4     | TGATTCCACTGCTGCAGGAG                                |                               |
| TKFC-gRNA-5     | CGAAGCGGATGGCGCTGGTG                                | For crispr / cas9 of TKFC     |
| TKFC-gRNA-6     | TGGCACCACCCACAGCCGTG                                |                               |
| tag-TKFC-F      | ACTATAGGGAGACCCAAGCTTATGACCTCCAAGAA<br>GCTGGTGA ACT | For TKFC-FL PCR               |

|                        |                                                                                                                    |                            |
|------------------------|--------------------------------------------------------------------------------------------------------------------|----------------------------|
| tag-TKFC-R             | GTCGTCCTTGTAGTCGGATCCGCTCTGCAAGACCTC<br>CAAGATGG                                                                   |                            |
| tag-TKFC(N)-F          | ACTATAGGGAGACCCAAGCTTATGACCTCCAAGAA<br>GCTGGTGA ACT                                                                | For TKFC(N) PCR            |
| tag-TKFC(N)-R          | GTCGTCCTTGTAGTCGGATCCCCGTTCCAGCACCAG<br>CG                                                                         |                            |
| tag-TKFC(C)-F          | ACTATAGGGAGACCCAAGCTTGTGCAGTCTCCATT<br>ACTGGGC                                                                     | For TKFC(C) PCR            |
| tag-TKFC(C)-R          | GTCGTCCTTGTAGTCGGATCCGCTCTGCAAGACCTC<br>CAAGATGG                                                                   |                            |
| tag-MDA5-F             | GCTGGTACCGAGCTCGGATCCATGTCTGAATGGGTAT<br>TCCACAGACGAG                                                              | For MDA5-FL PCR            |
| tag-MDA5-R             | TGCTGGATATCTGCAGAATTCATCCTCATCACTAAA<br>TAAACAGCATTCTGAATAGTCAAGA                                                  |                            |
| tag-MDA5(N)-F          | GCTGGTACCGAGCTCGGATCCATGTCTGAATGGGTAT<br>TCCACAGACGAG                                                              | For MDA5(N) RT-PCR         |
| tag-MDA5(N)-R          | TGCTGGATATCTGCAGAATTCCTGGAGTTCTGGCTC<br>CGGG                                                                       |                            |
| tag-MDA5(C)-F          | GCTGGTACCGAGCTCGGATCCCTCAGGCCTTACCAA<br>ATGGAAGTTGC                                                                | For MDA5(C) RT-PCR         |
| tag-MDA5(C)-R          | TGCTGGATATCTGCAGAATTCATCCTCATCACTAAAT<br>AAACAGCATTCTGAATAGTCAAGA                                                  |                            |
| circSOBP antisense-F   | AGCCATACCAGCCAAGGAGT                                                                                               | For circSOBP Northern blot |
| circSOBP antisense-R   | TAATACGACTCACTATAGGGAGAATGGACTCAGTG<br>ACTCACCT                                                                    |                            |
| circSOBP -fish-oligo-1 | TCCACCACCTTTCATAAAGCCACCAGCAGAACTTTCG<br>AGAAAACACCATGAATGAACTCCTTGGCTGG                                           | For circSOBP FISH          |
| circSOBP -fish-oligo-2 | TGGCAGTGTGCCATTATTGTACCTTAAATTCCACCA<br>CCTTTCATAAAGCCACCAGCAGAACTTTCAGAAAA<br>CACCATGAATGAACTCCTTGGCTGGTATGGCTATG |                            |
| ACTB-F                 | CCAACACAGTGCTGTCTGG                                                                                                | For ACTB PCR               |
| ACTB-R                 | GAGTACTTGCGCTCAGGAG                                                                                                |                            |
| GAPDH-F                | CTTCATTGACCTCAACTACATGG                                                                                            | For GAPDH RT-qPCR          |
| GAPDH-R                | CTCGCTCCTGGAAGATGGTGAT                                                                                             |                            |

|                |                                                |                                        |
|----------------|------------------------------------------------|----------------------------------------|
| U1-F           | GATACCATGATCACGAAGGTG                          | For U1 RT-qPCR                         |
| U1-R           | CTACCACAAATTATGCAGTCG                          |                                        |
| si-NC          | UUCUCCGAACGUGUCACGU<br>ACGUGACACGUUCGGAGAA     | Negative control                       |
| si-circSOBP-1  | UGCAAAGUCCUGCUGGUGG<br>CCACCAGCAGGAACUUUGCA    | siRNAs of circSOBP                     |
| si- circSOBP-2 | UUCUGCAAAGUCCUGCUGG<br>CCAGCAGGAACUUUGCAGAA    |                                        |
| si-TKFC-1      | CAGUUGUGAUGAUGGUCAACA<br>UUGACCAUCAUCACAACUGAG | siRNAs of TKFC                         |
| si-TKFC-2      | GAAAGUAAUAAACUAUAAUA<br>UUAUAGUUUAAUUAACUUUCUU |                                        |
| Srcamble       | TTCTCCGAACGTGTCACGTTCGAACGTGTC                 | Control probe with 5'biotin labeled    |
| circSOBP-probe | TCTGCAAAGTTCCTGCTGGTGGCTTTATGA                 | For circSOBP RIP with 5'biotin labeled |

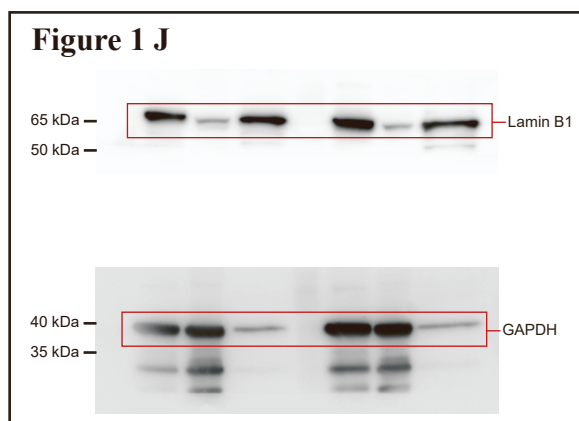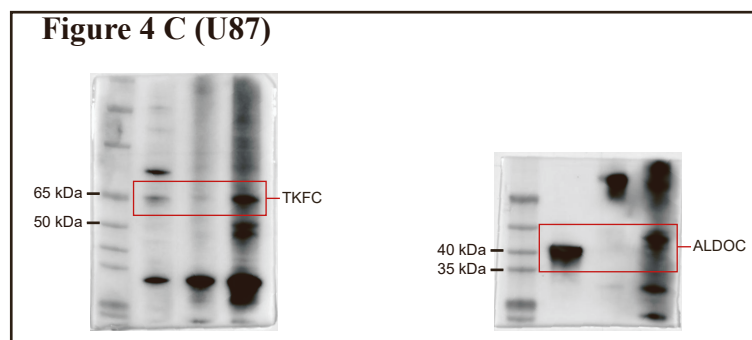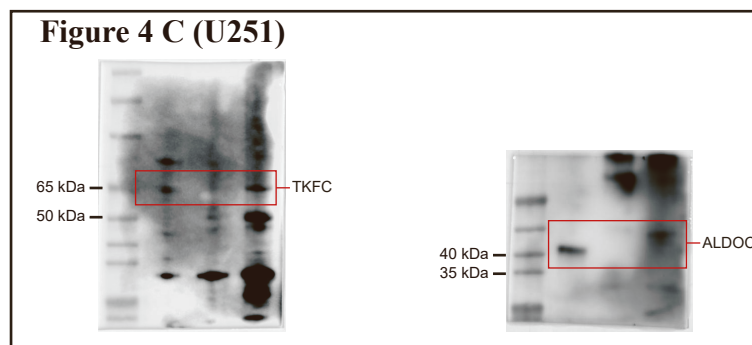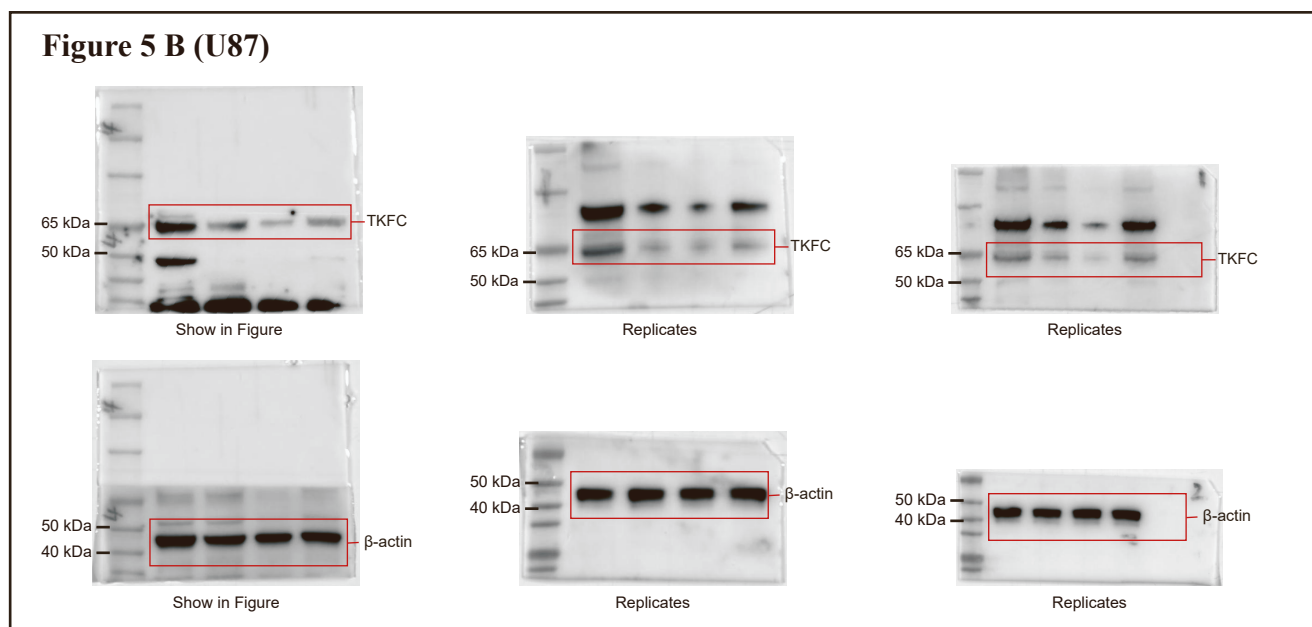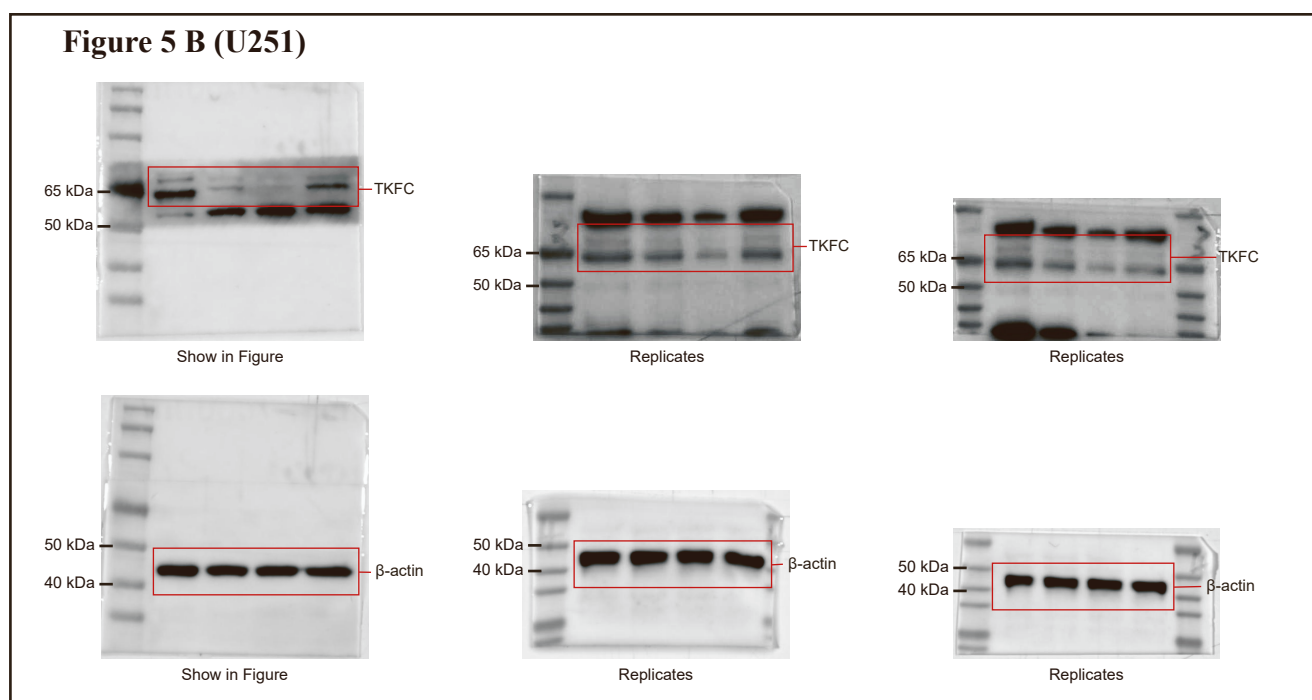

**Figure 6 D (U87)**

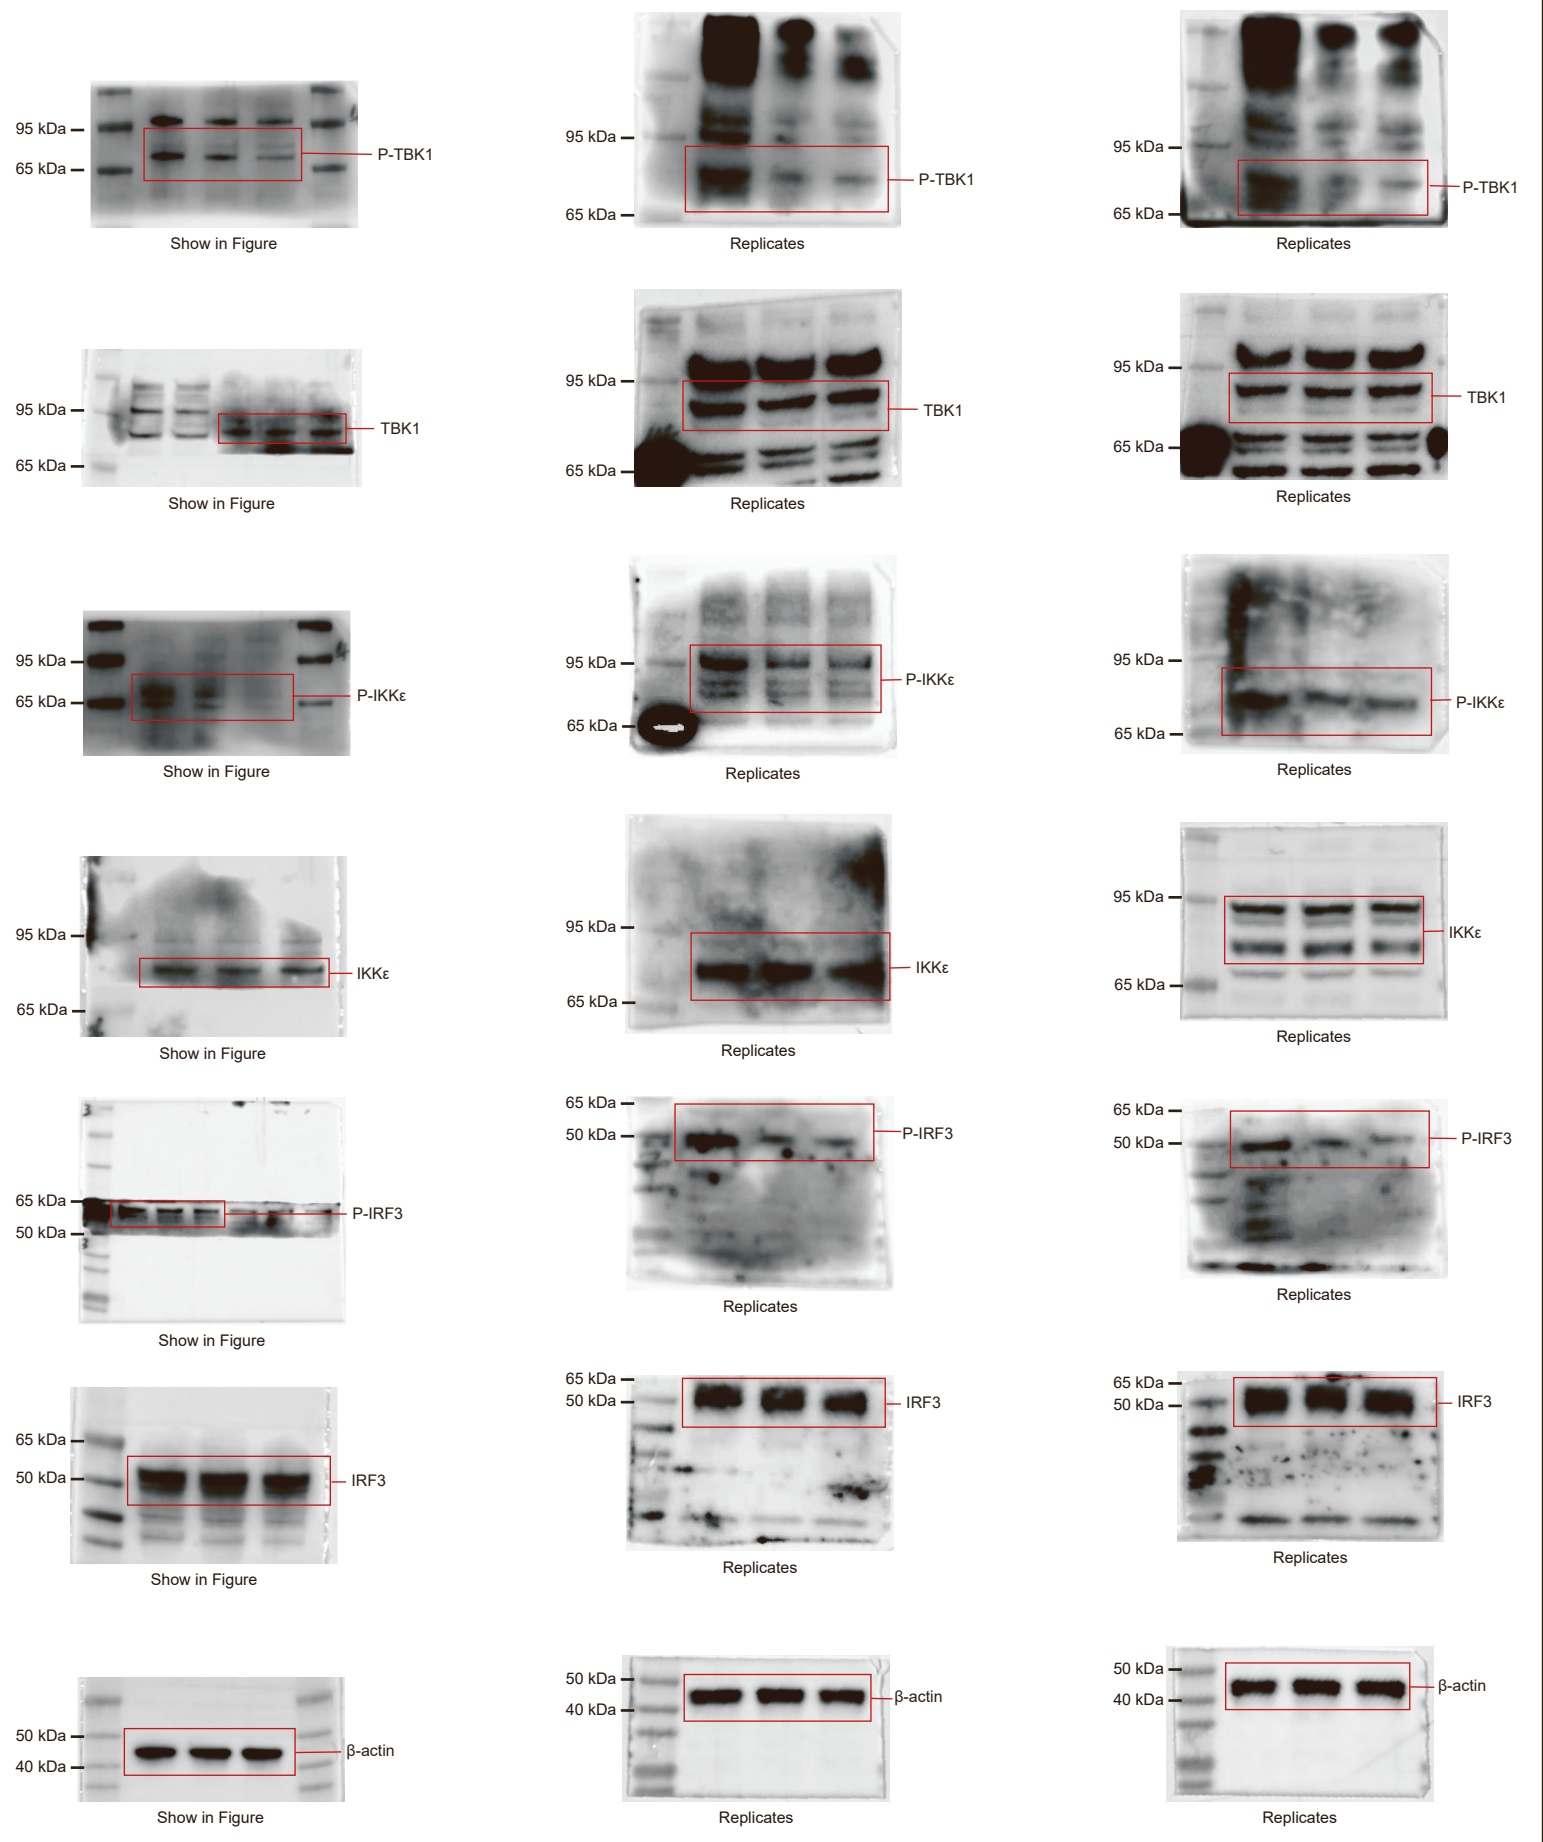





**Figure 6 E (U87)**

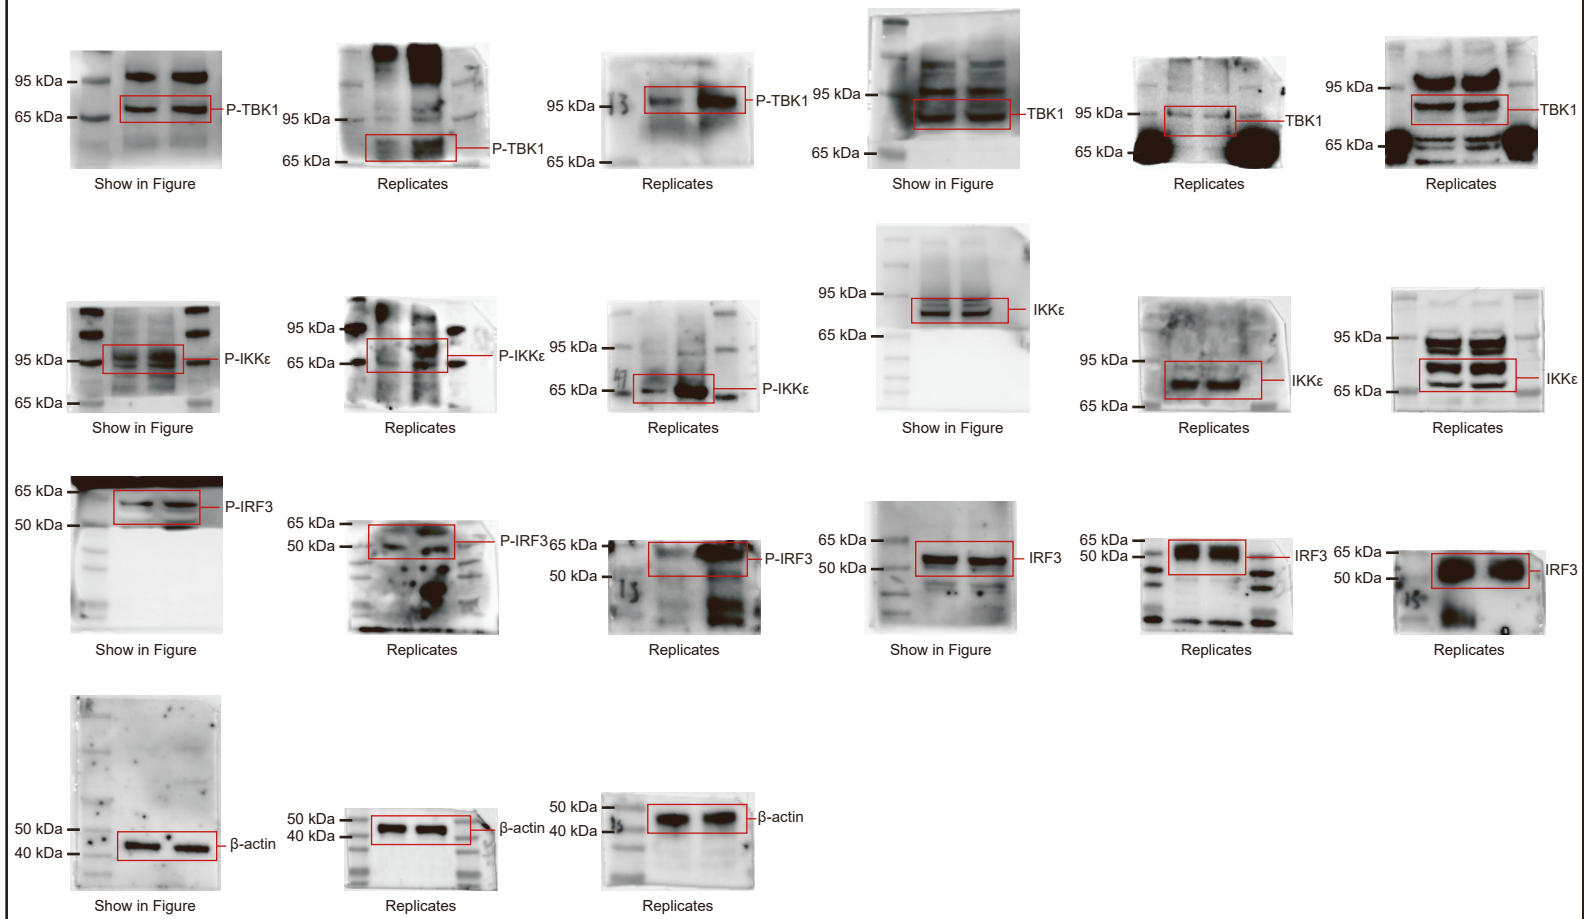

**Figure 6 E (U251)**

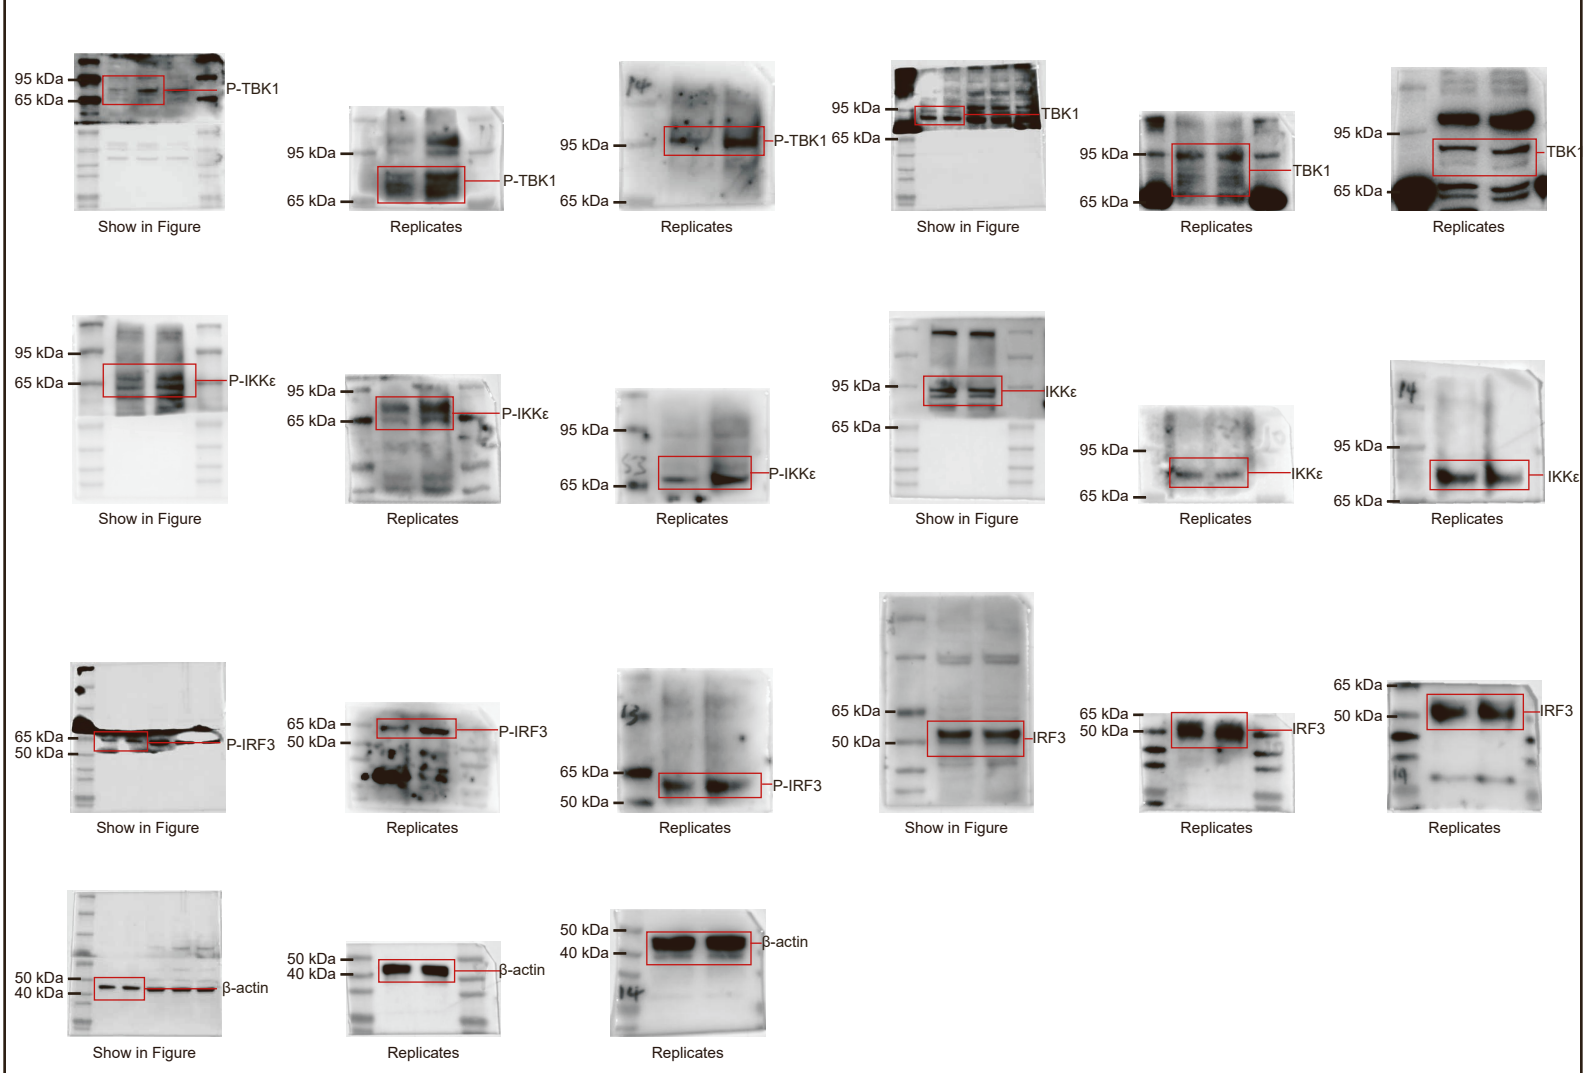

**Figure 6 F**

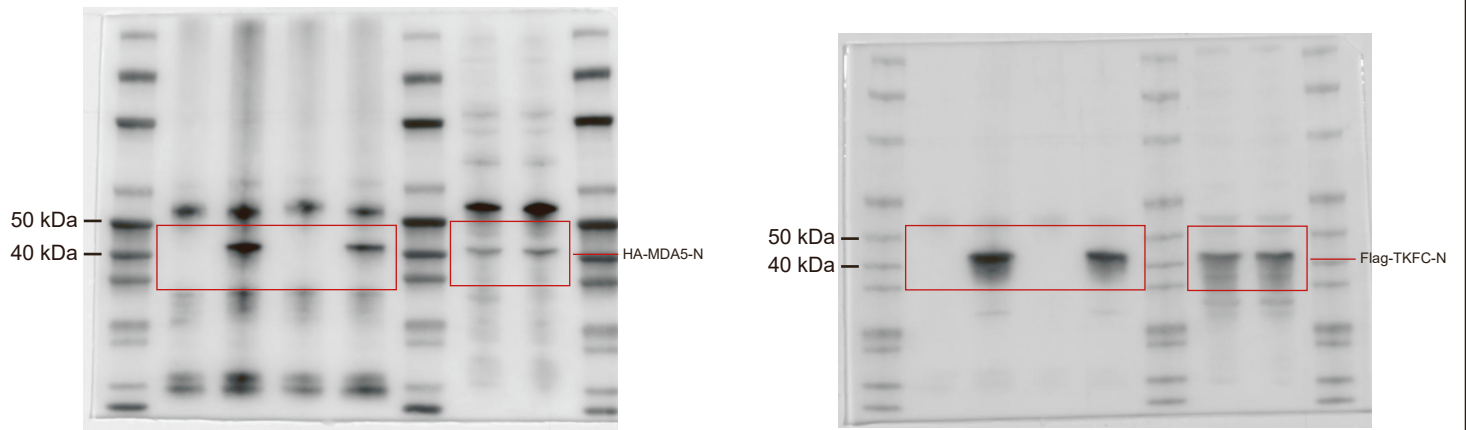

**Figure S9 A**

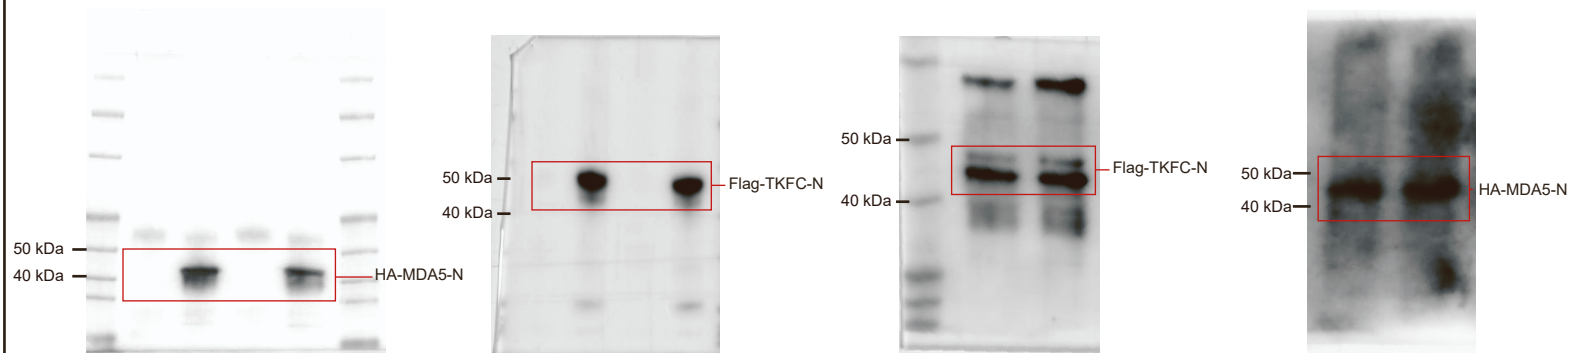

**Figure S9 B**

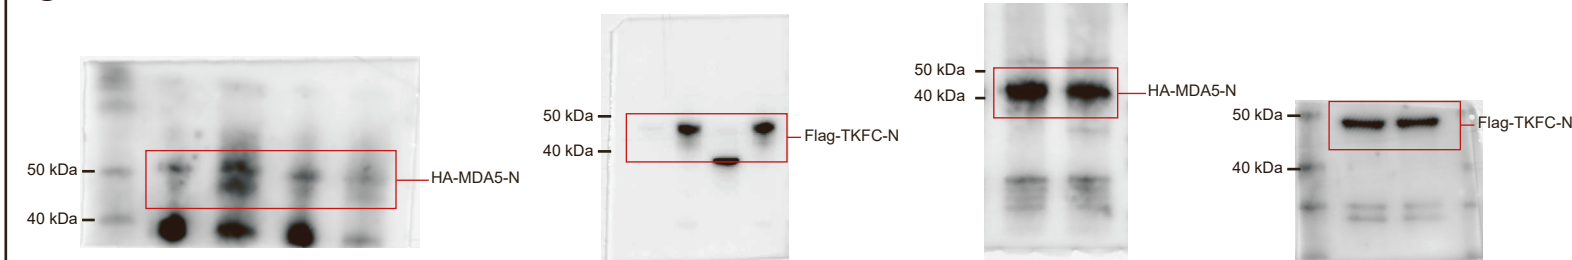

**Figure S4 D**

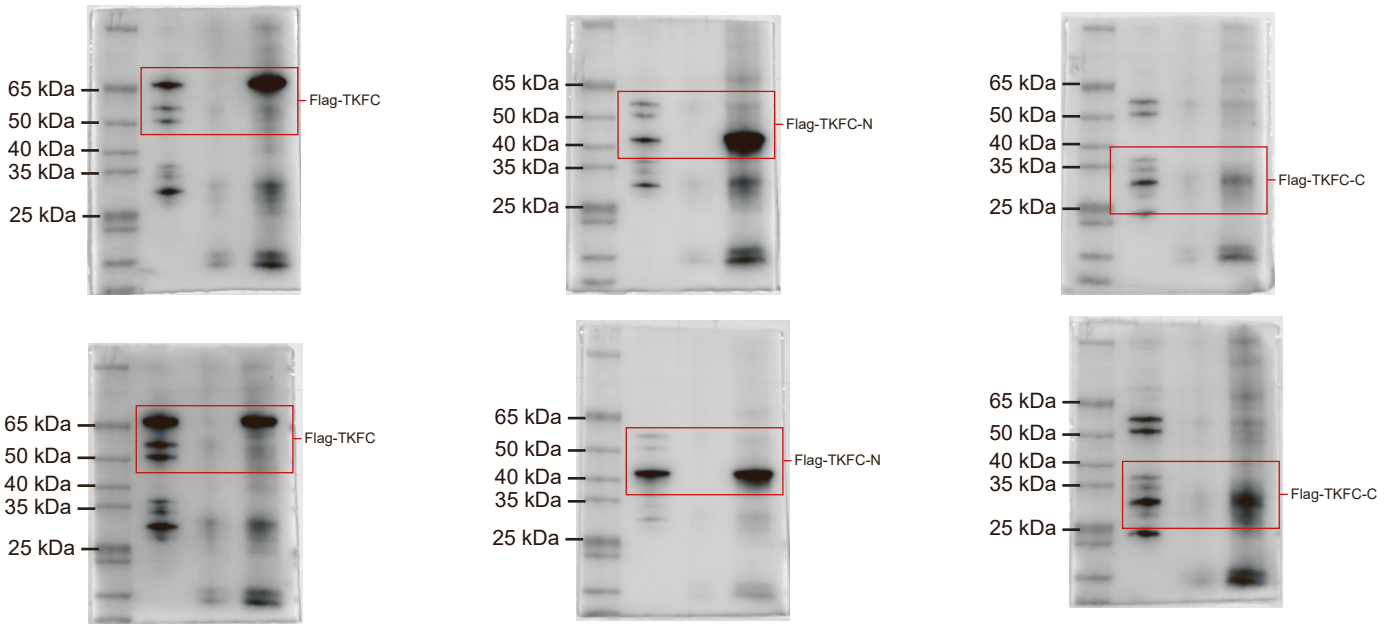

**Figure S8 B-C**

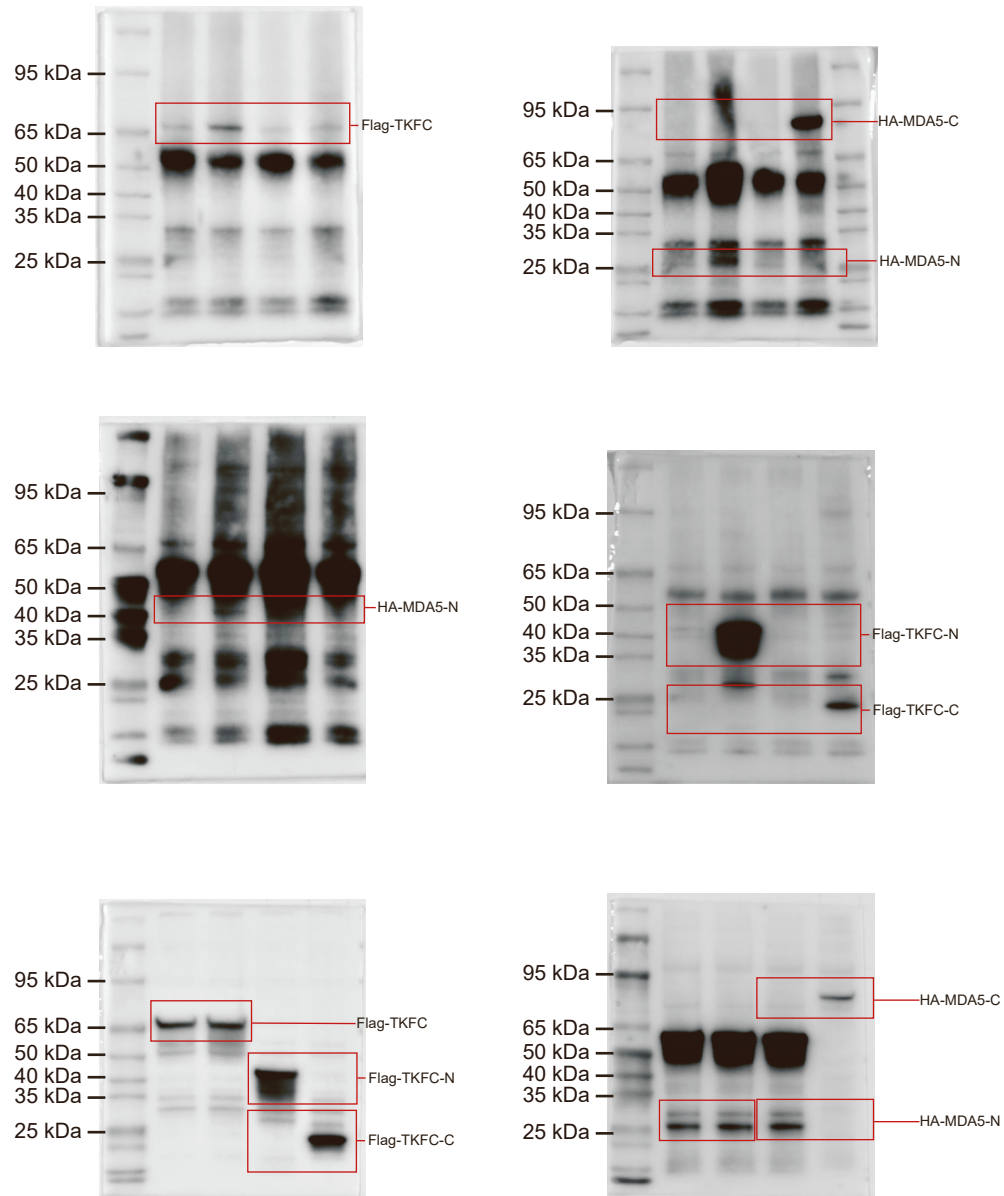



**Figure 6 I (U87)**

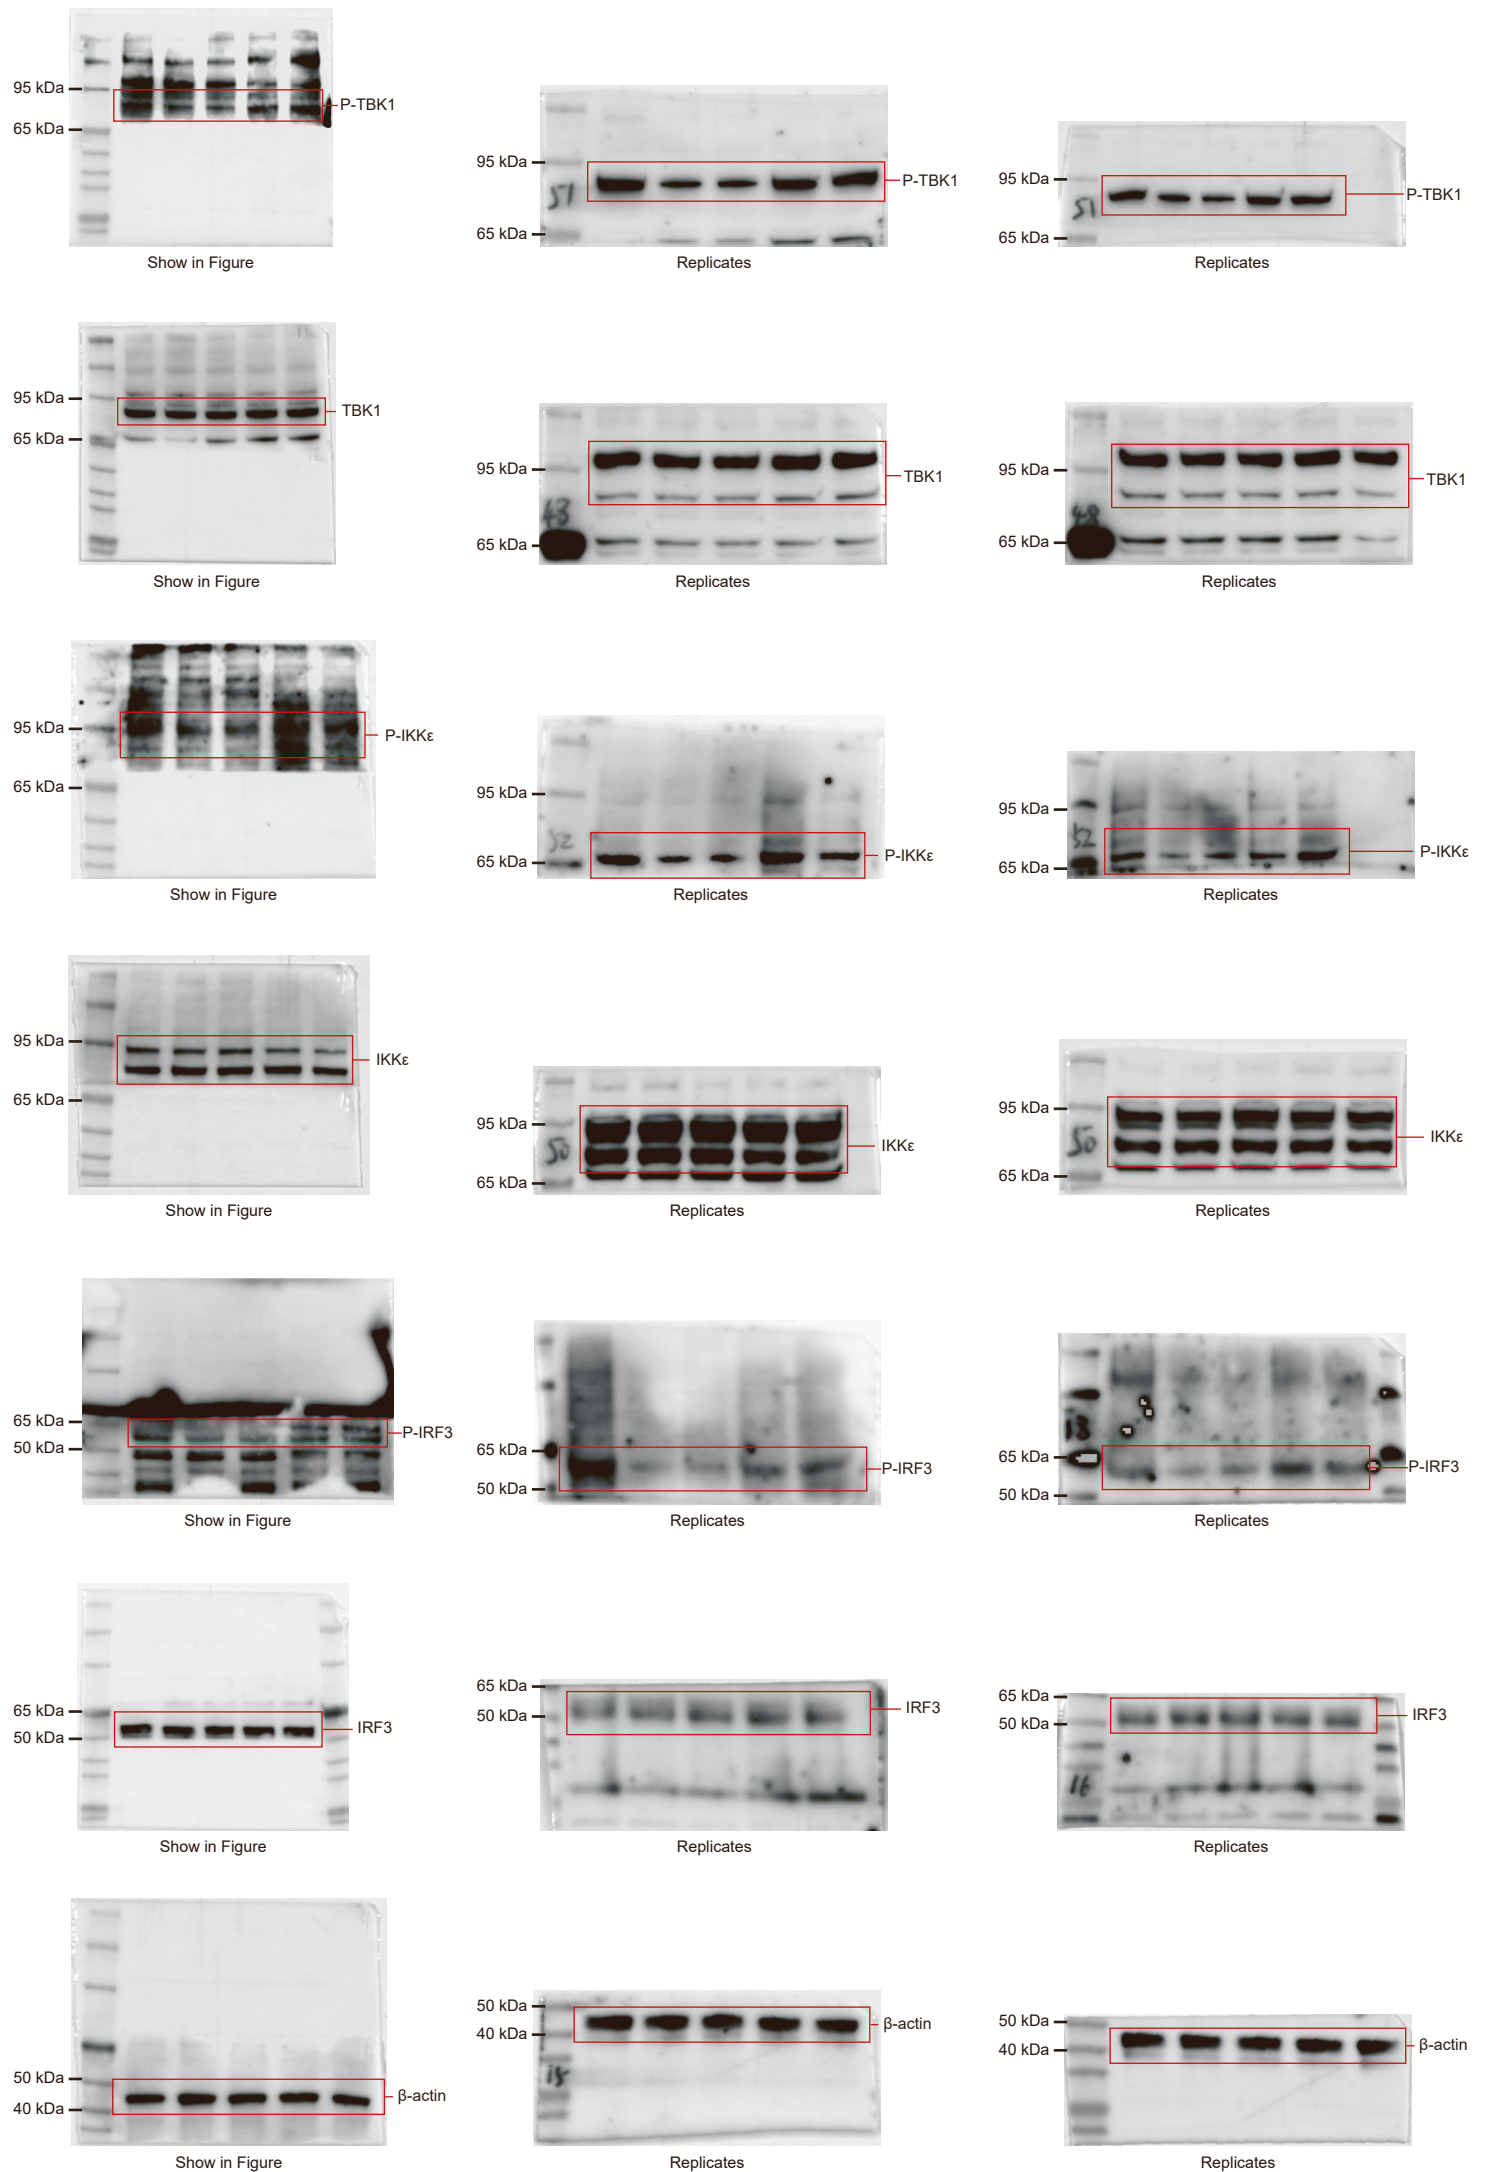

**Figure 6 I (U251)**

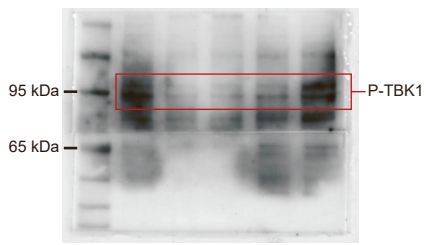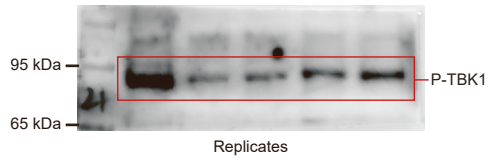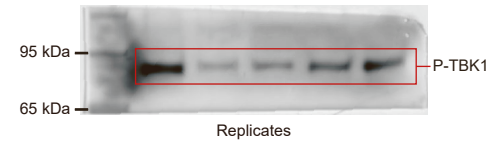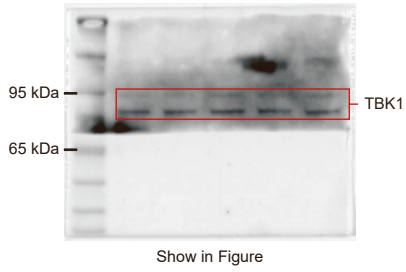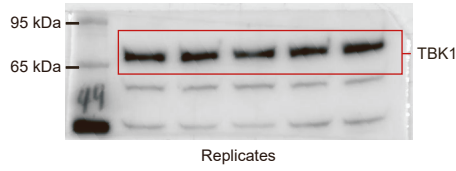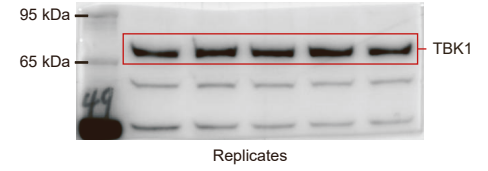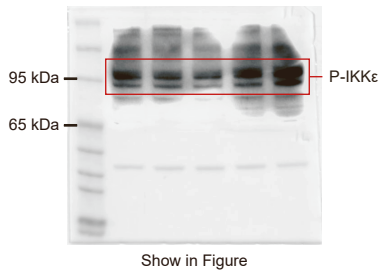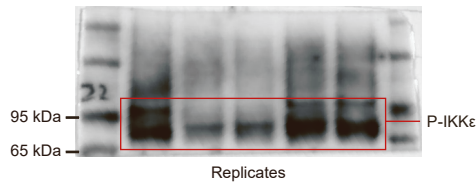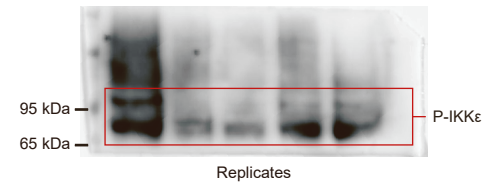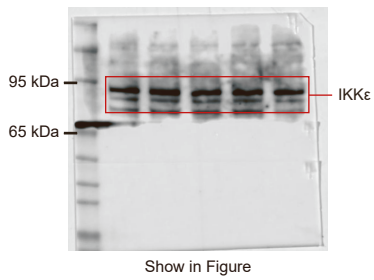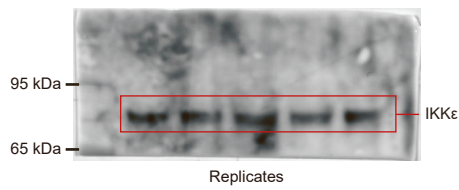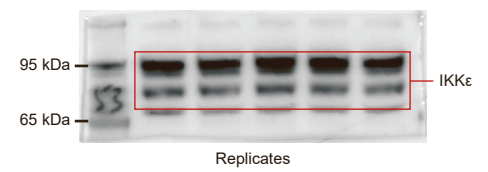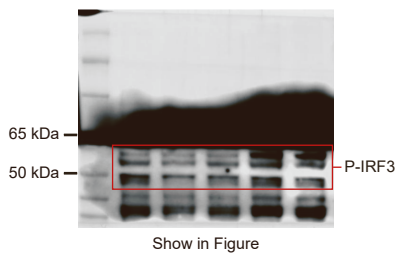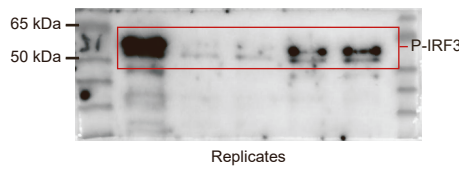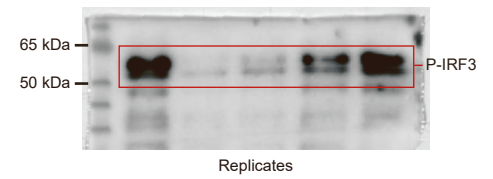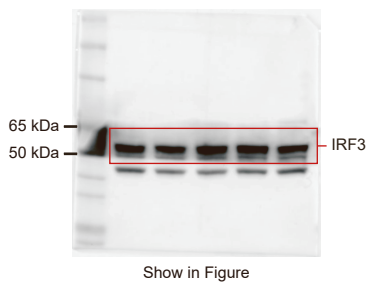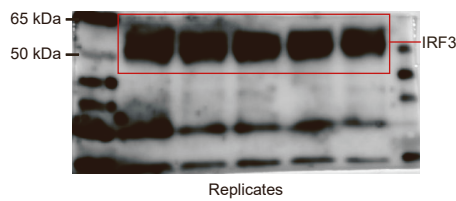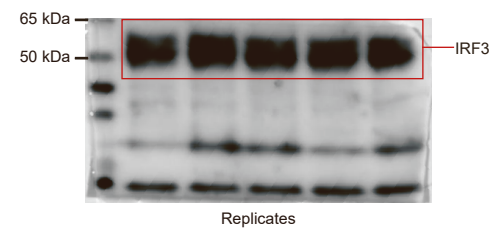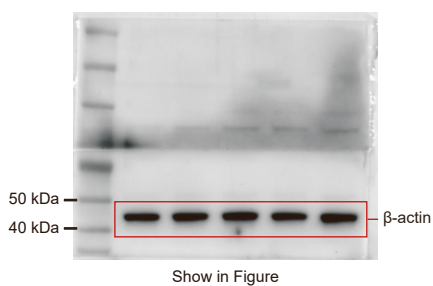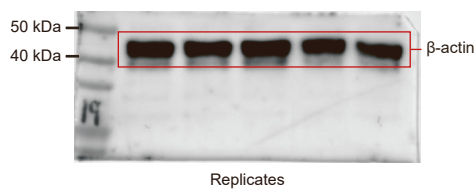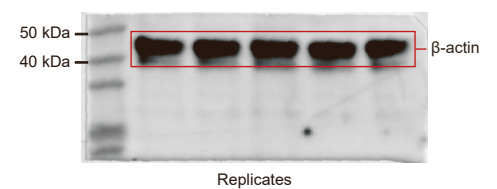

**Figure S4 F (U87)**

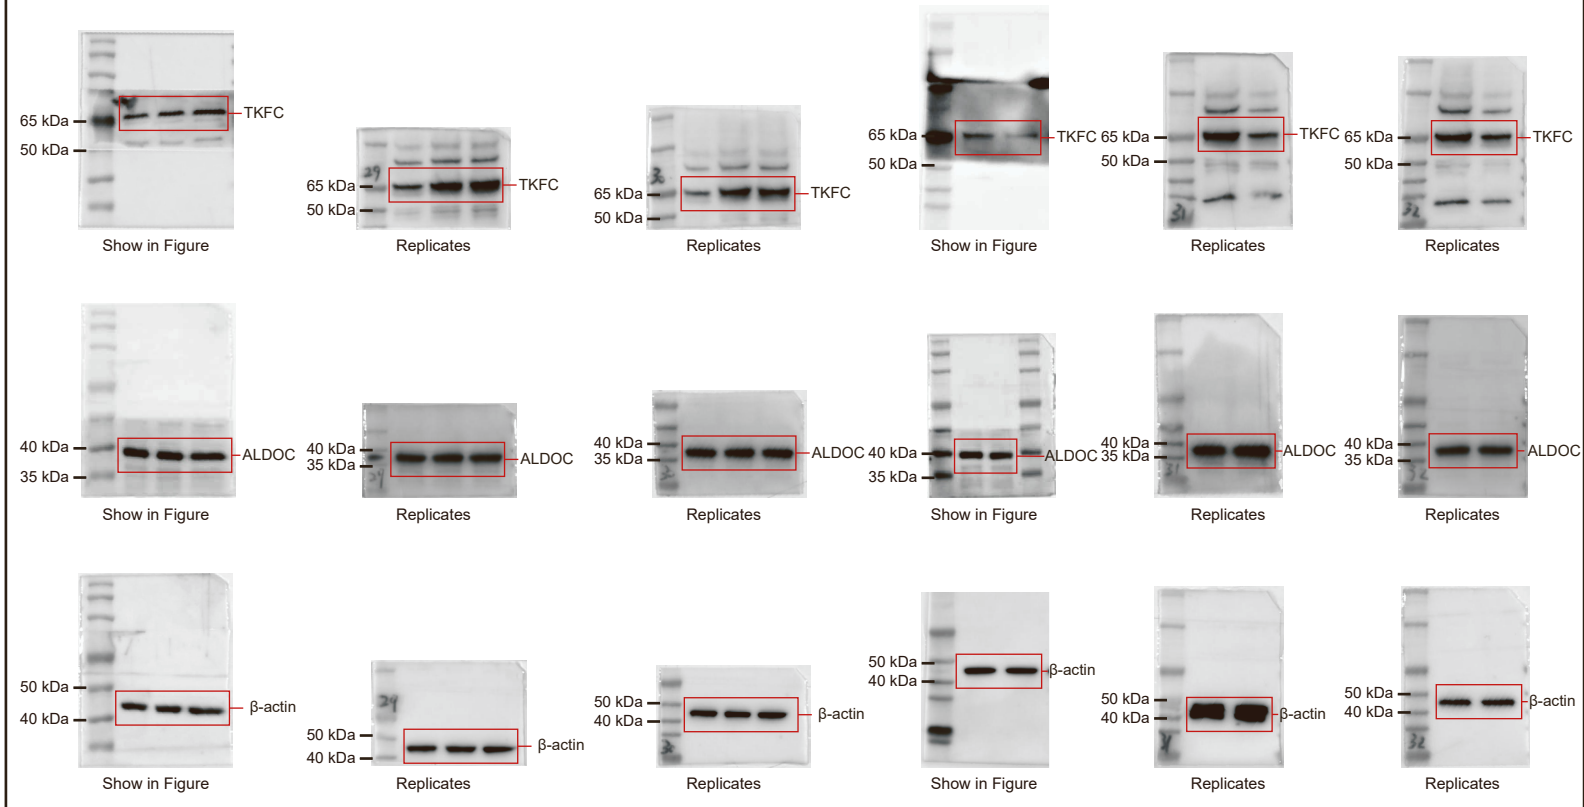

**Figure S4 F (U251)**

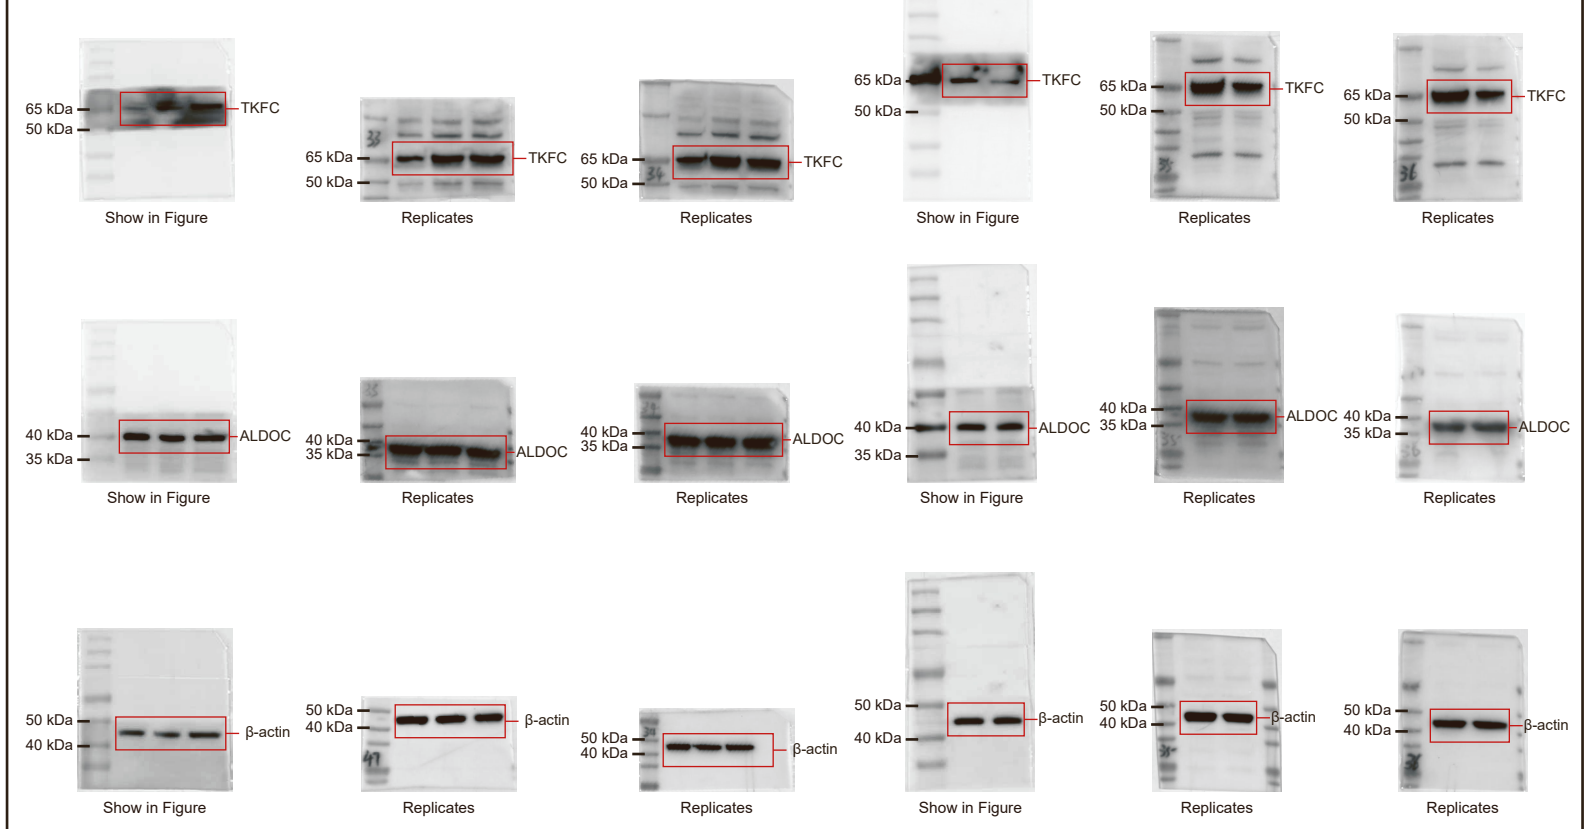



**Figure S8 A (U87)**

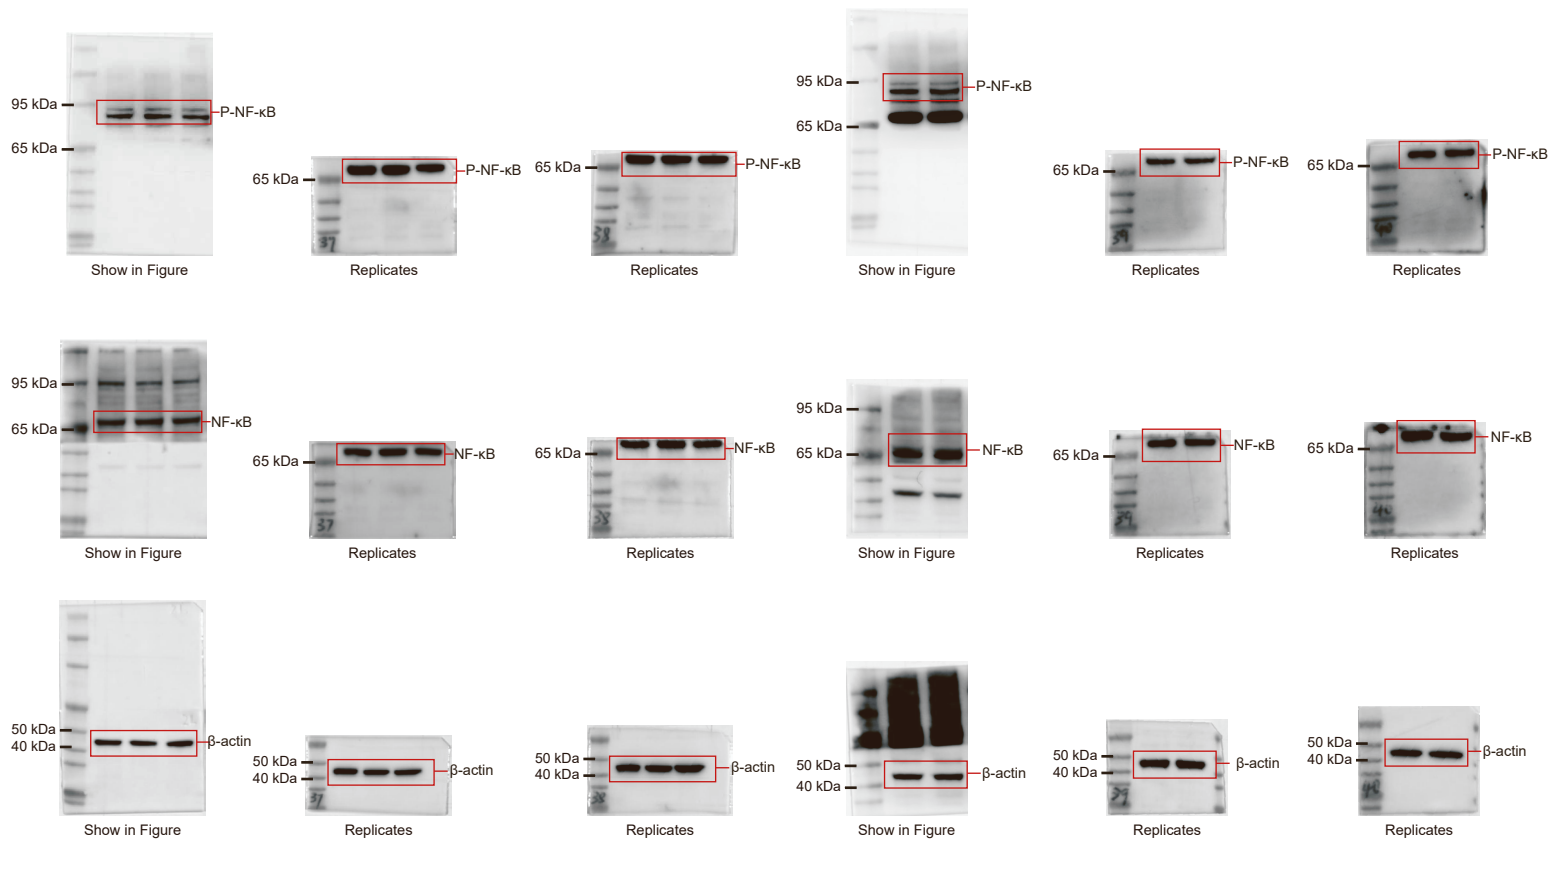

**Figure S8 A (U251)**

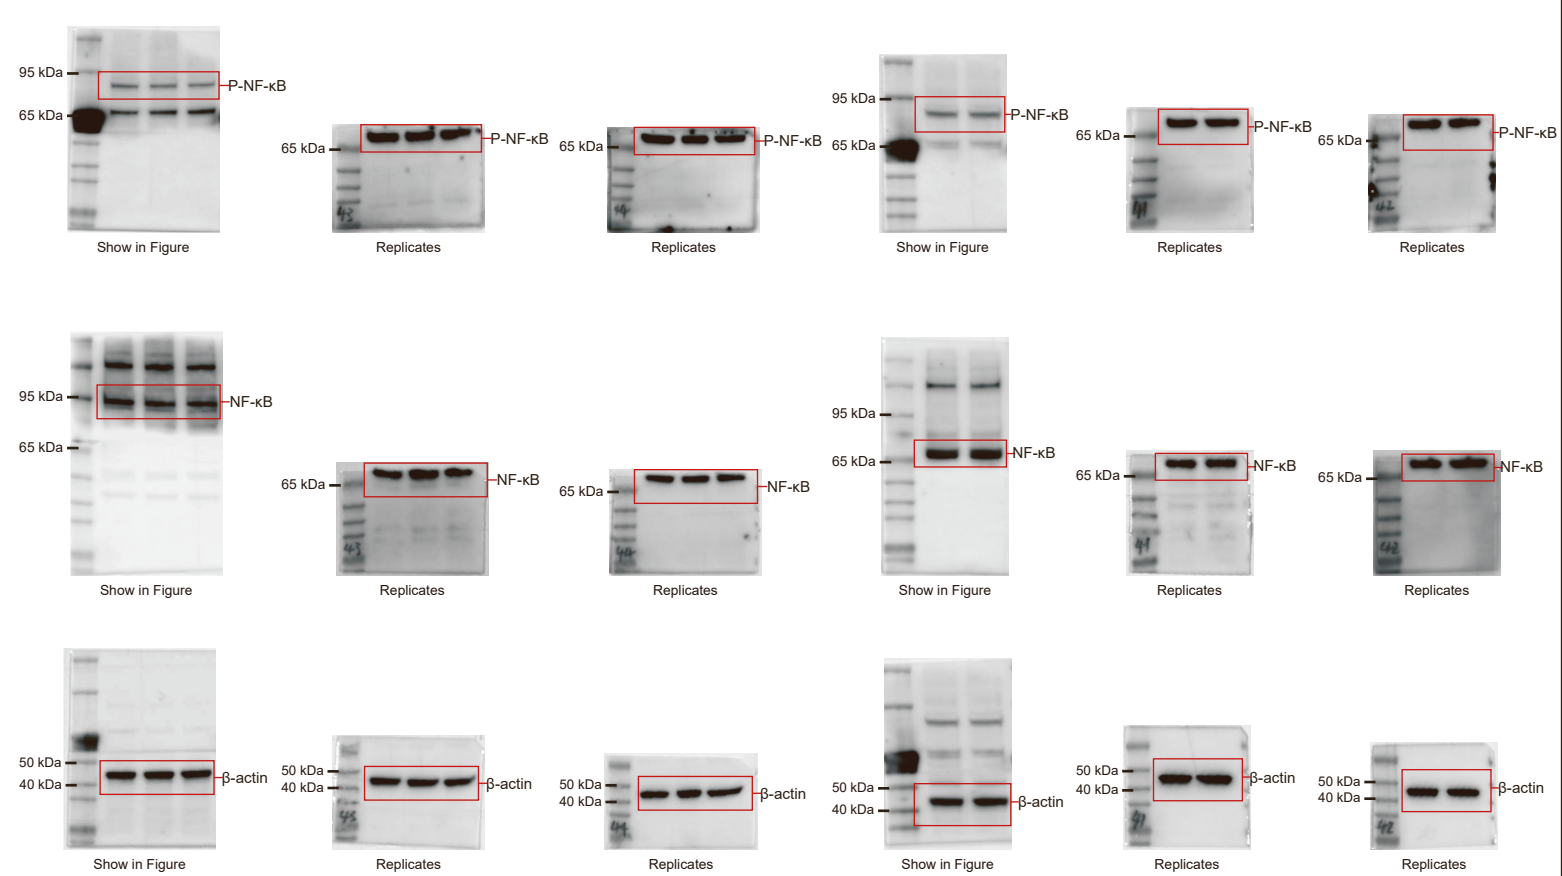

**Figure S9 E (U87)**

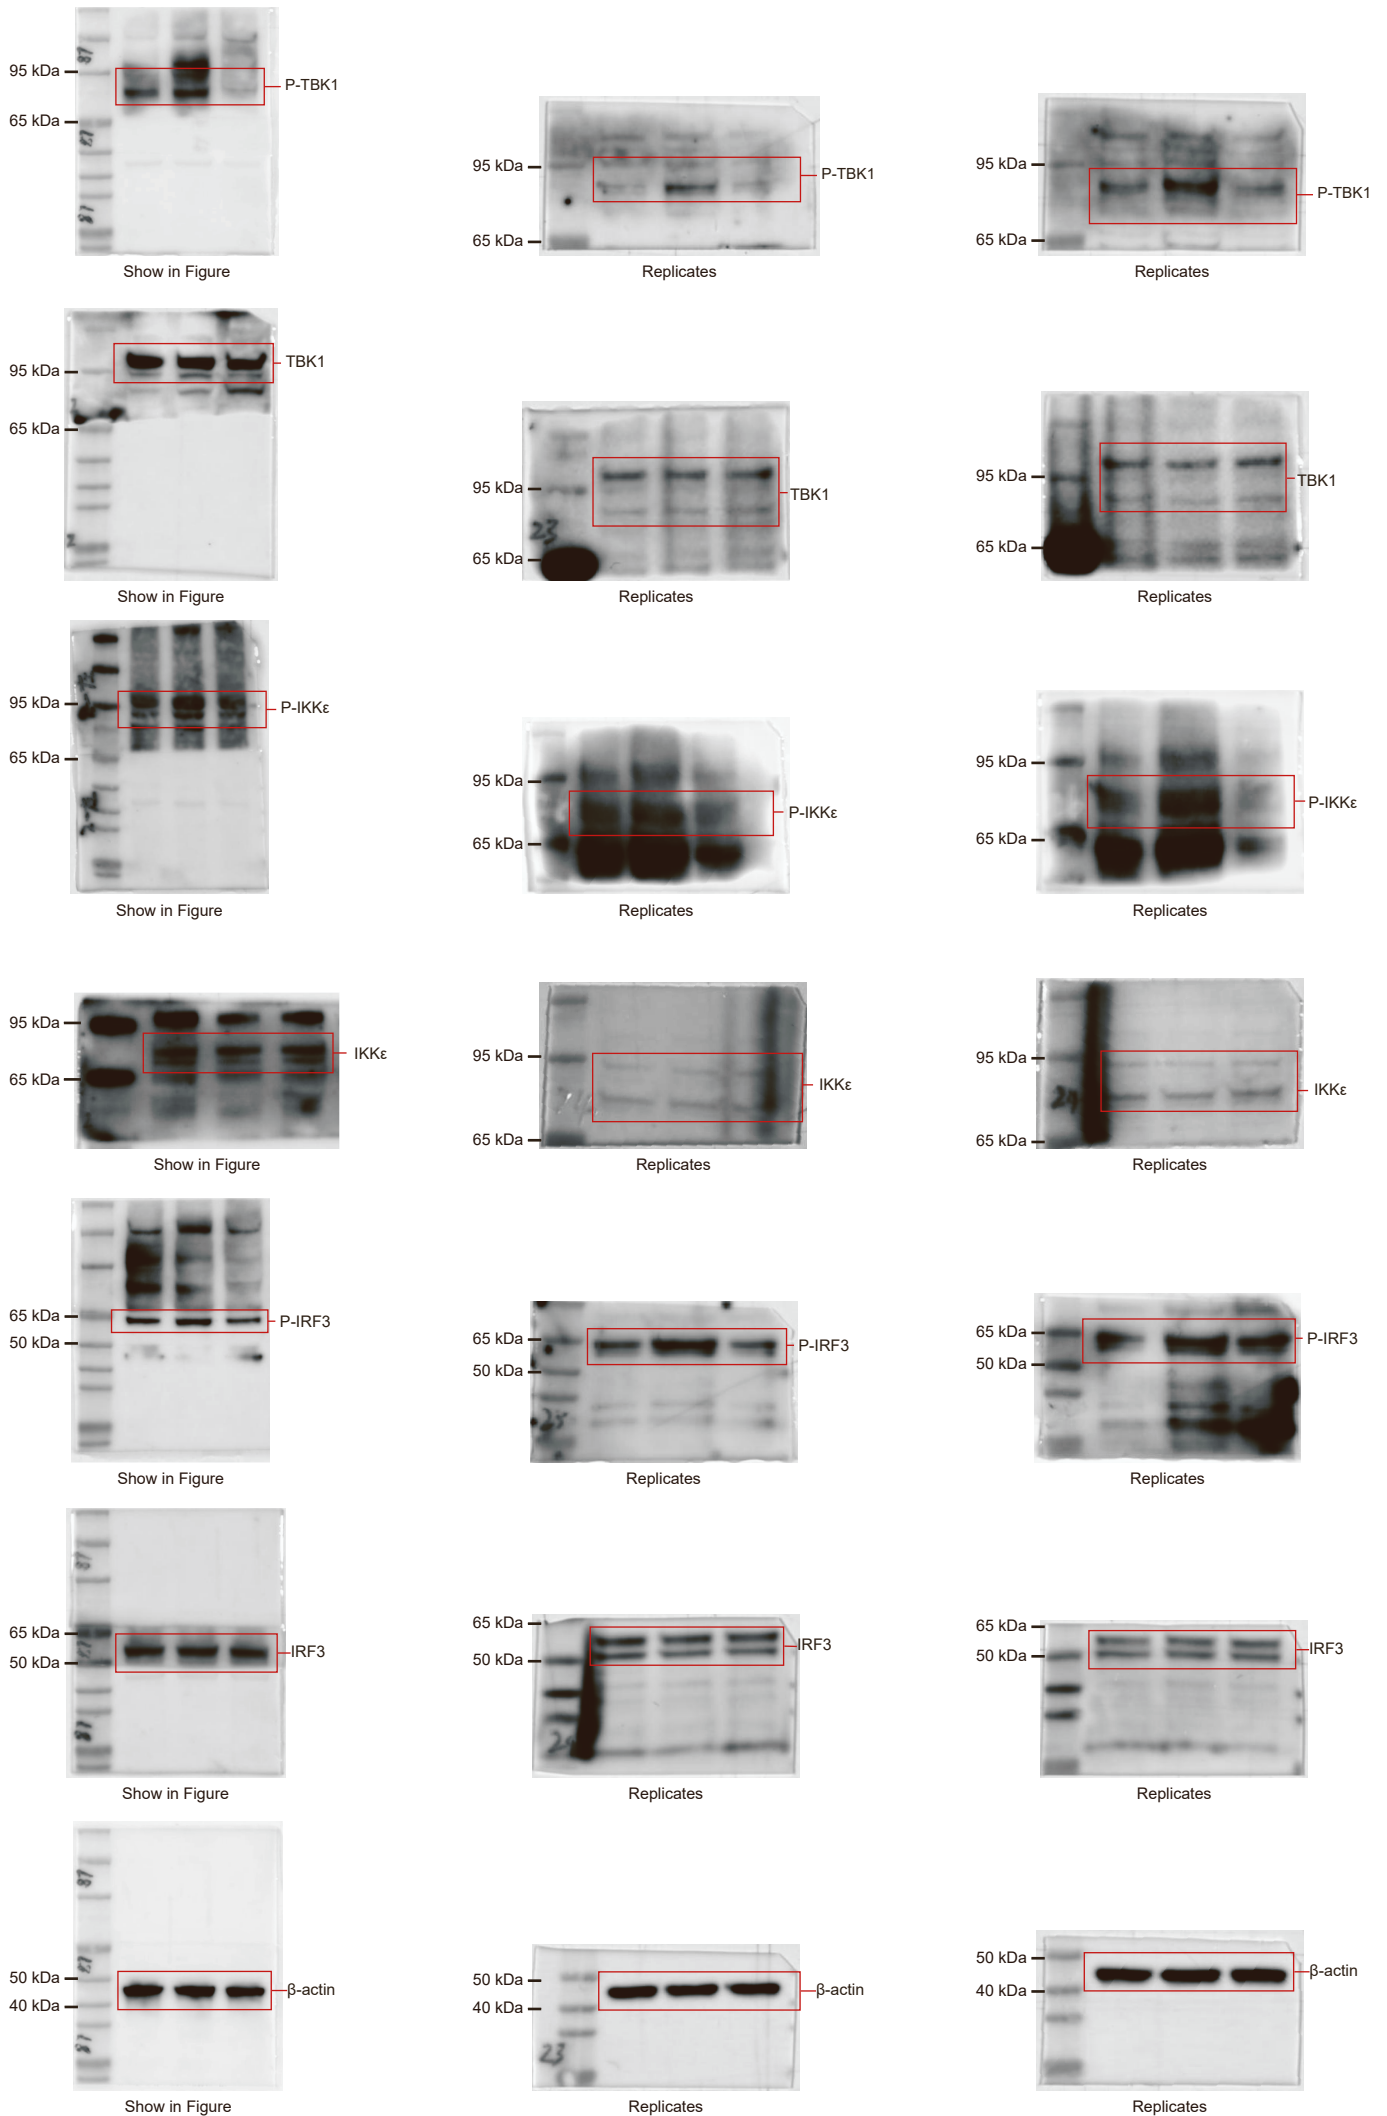

**Figure S9 E (U251)**

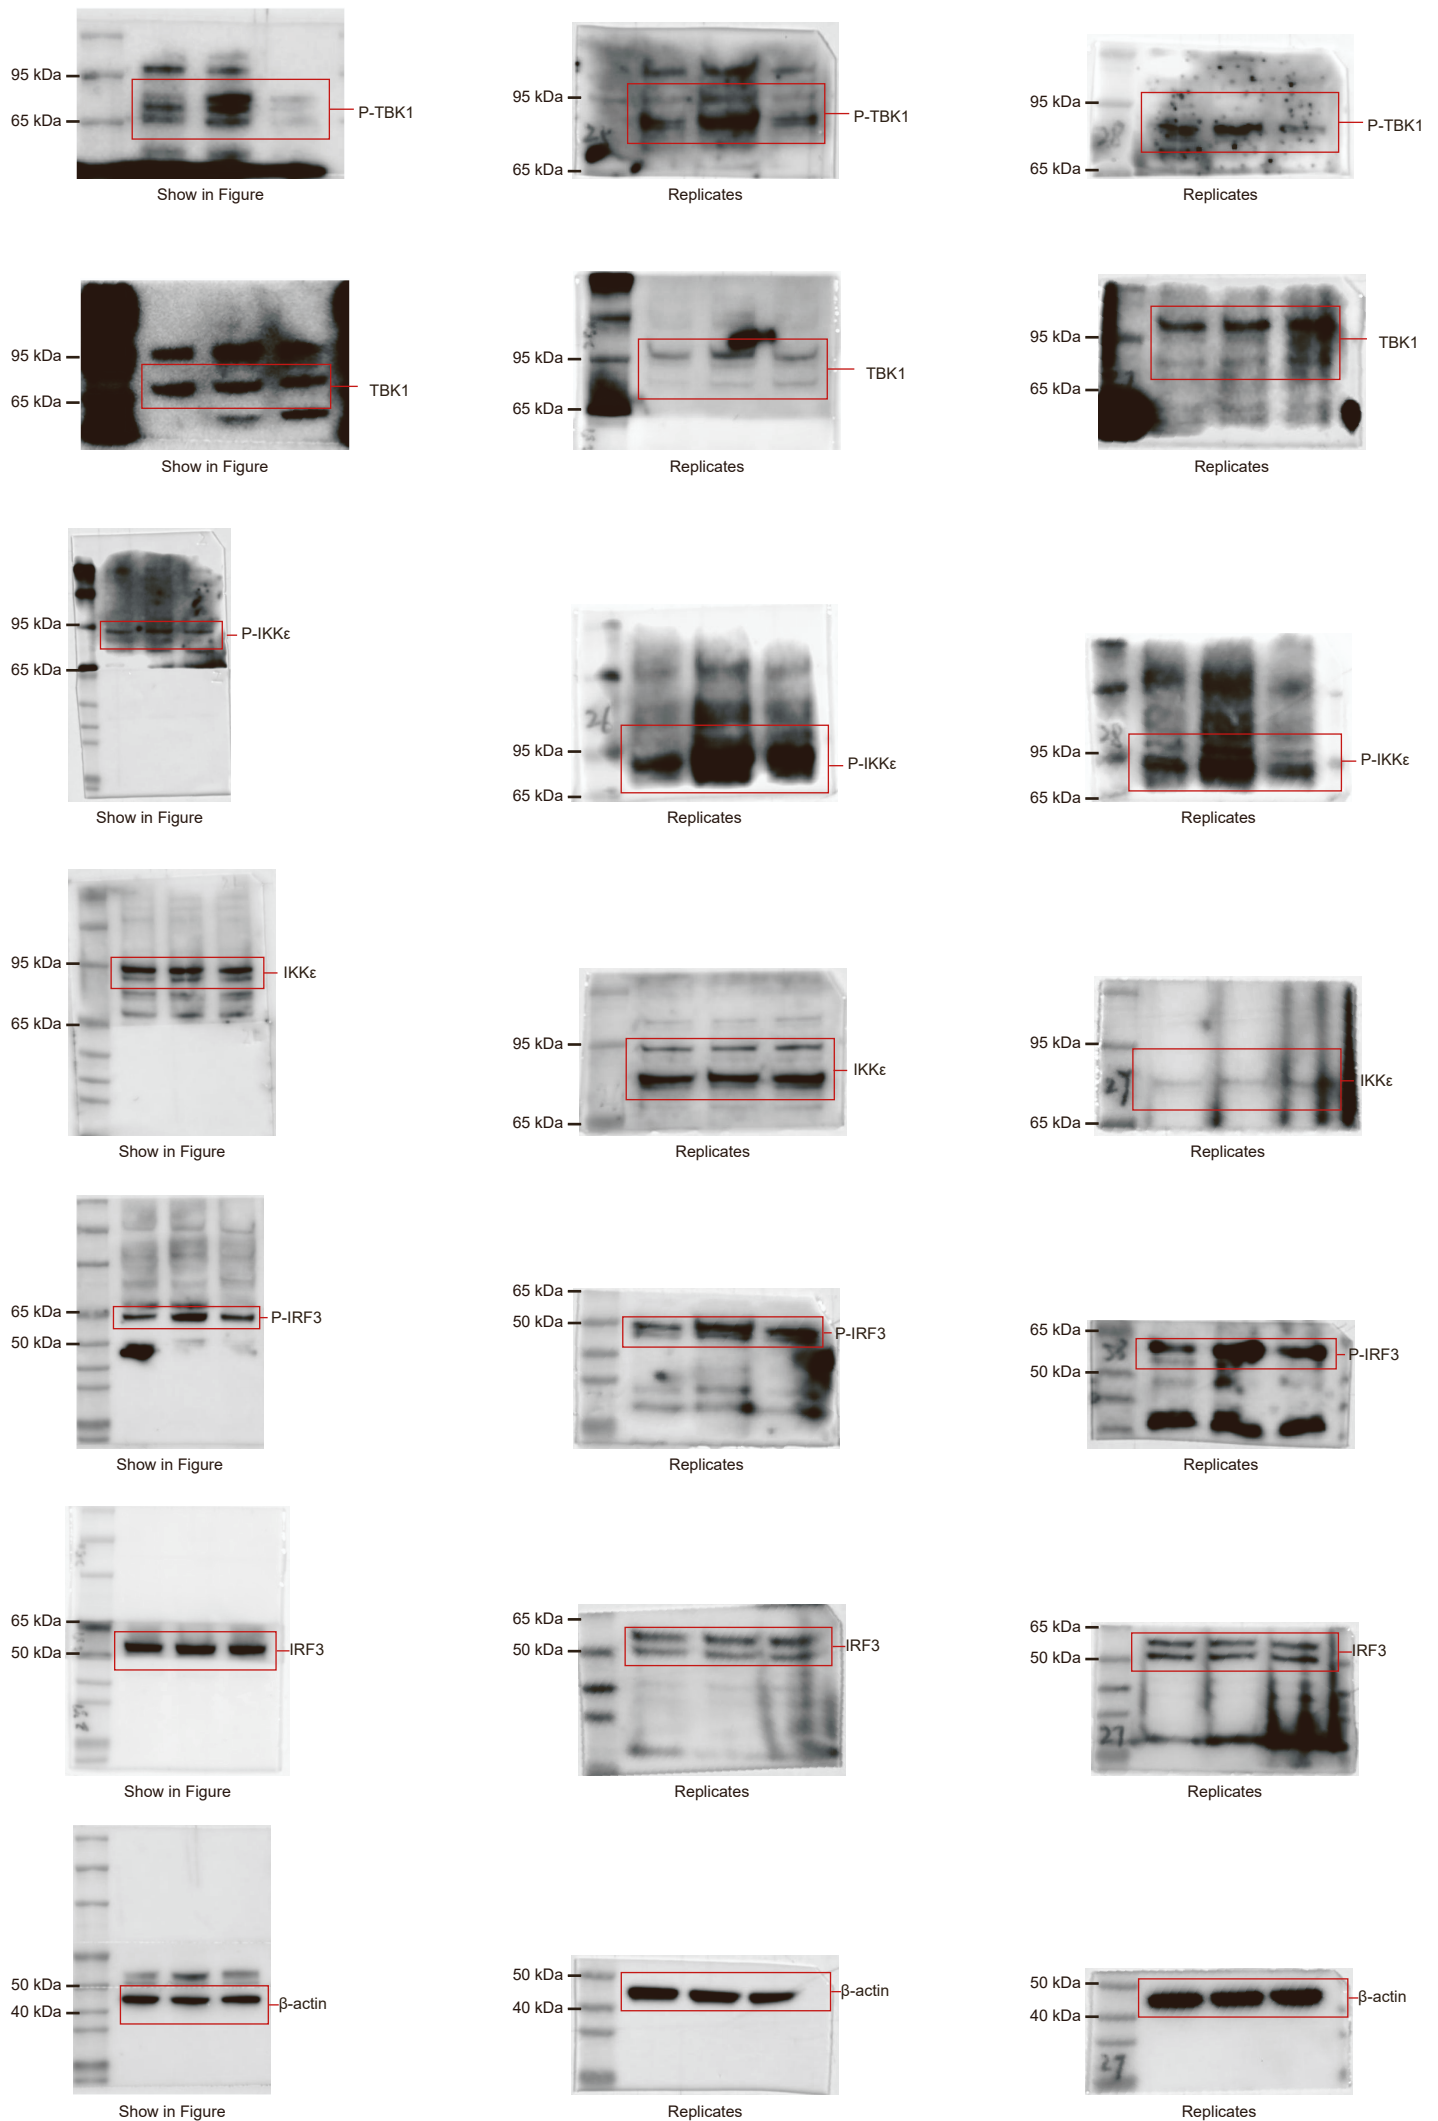

Supplement: mmc1.pdf [file mmc1.pdf]
